# Supplementary material
Source: MDPI journal article supplement (https://www.mdpi.com/2571-9408/5/3/73)

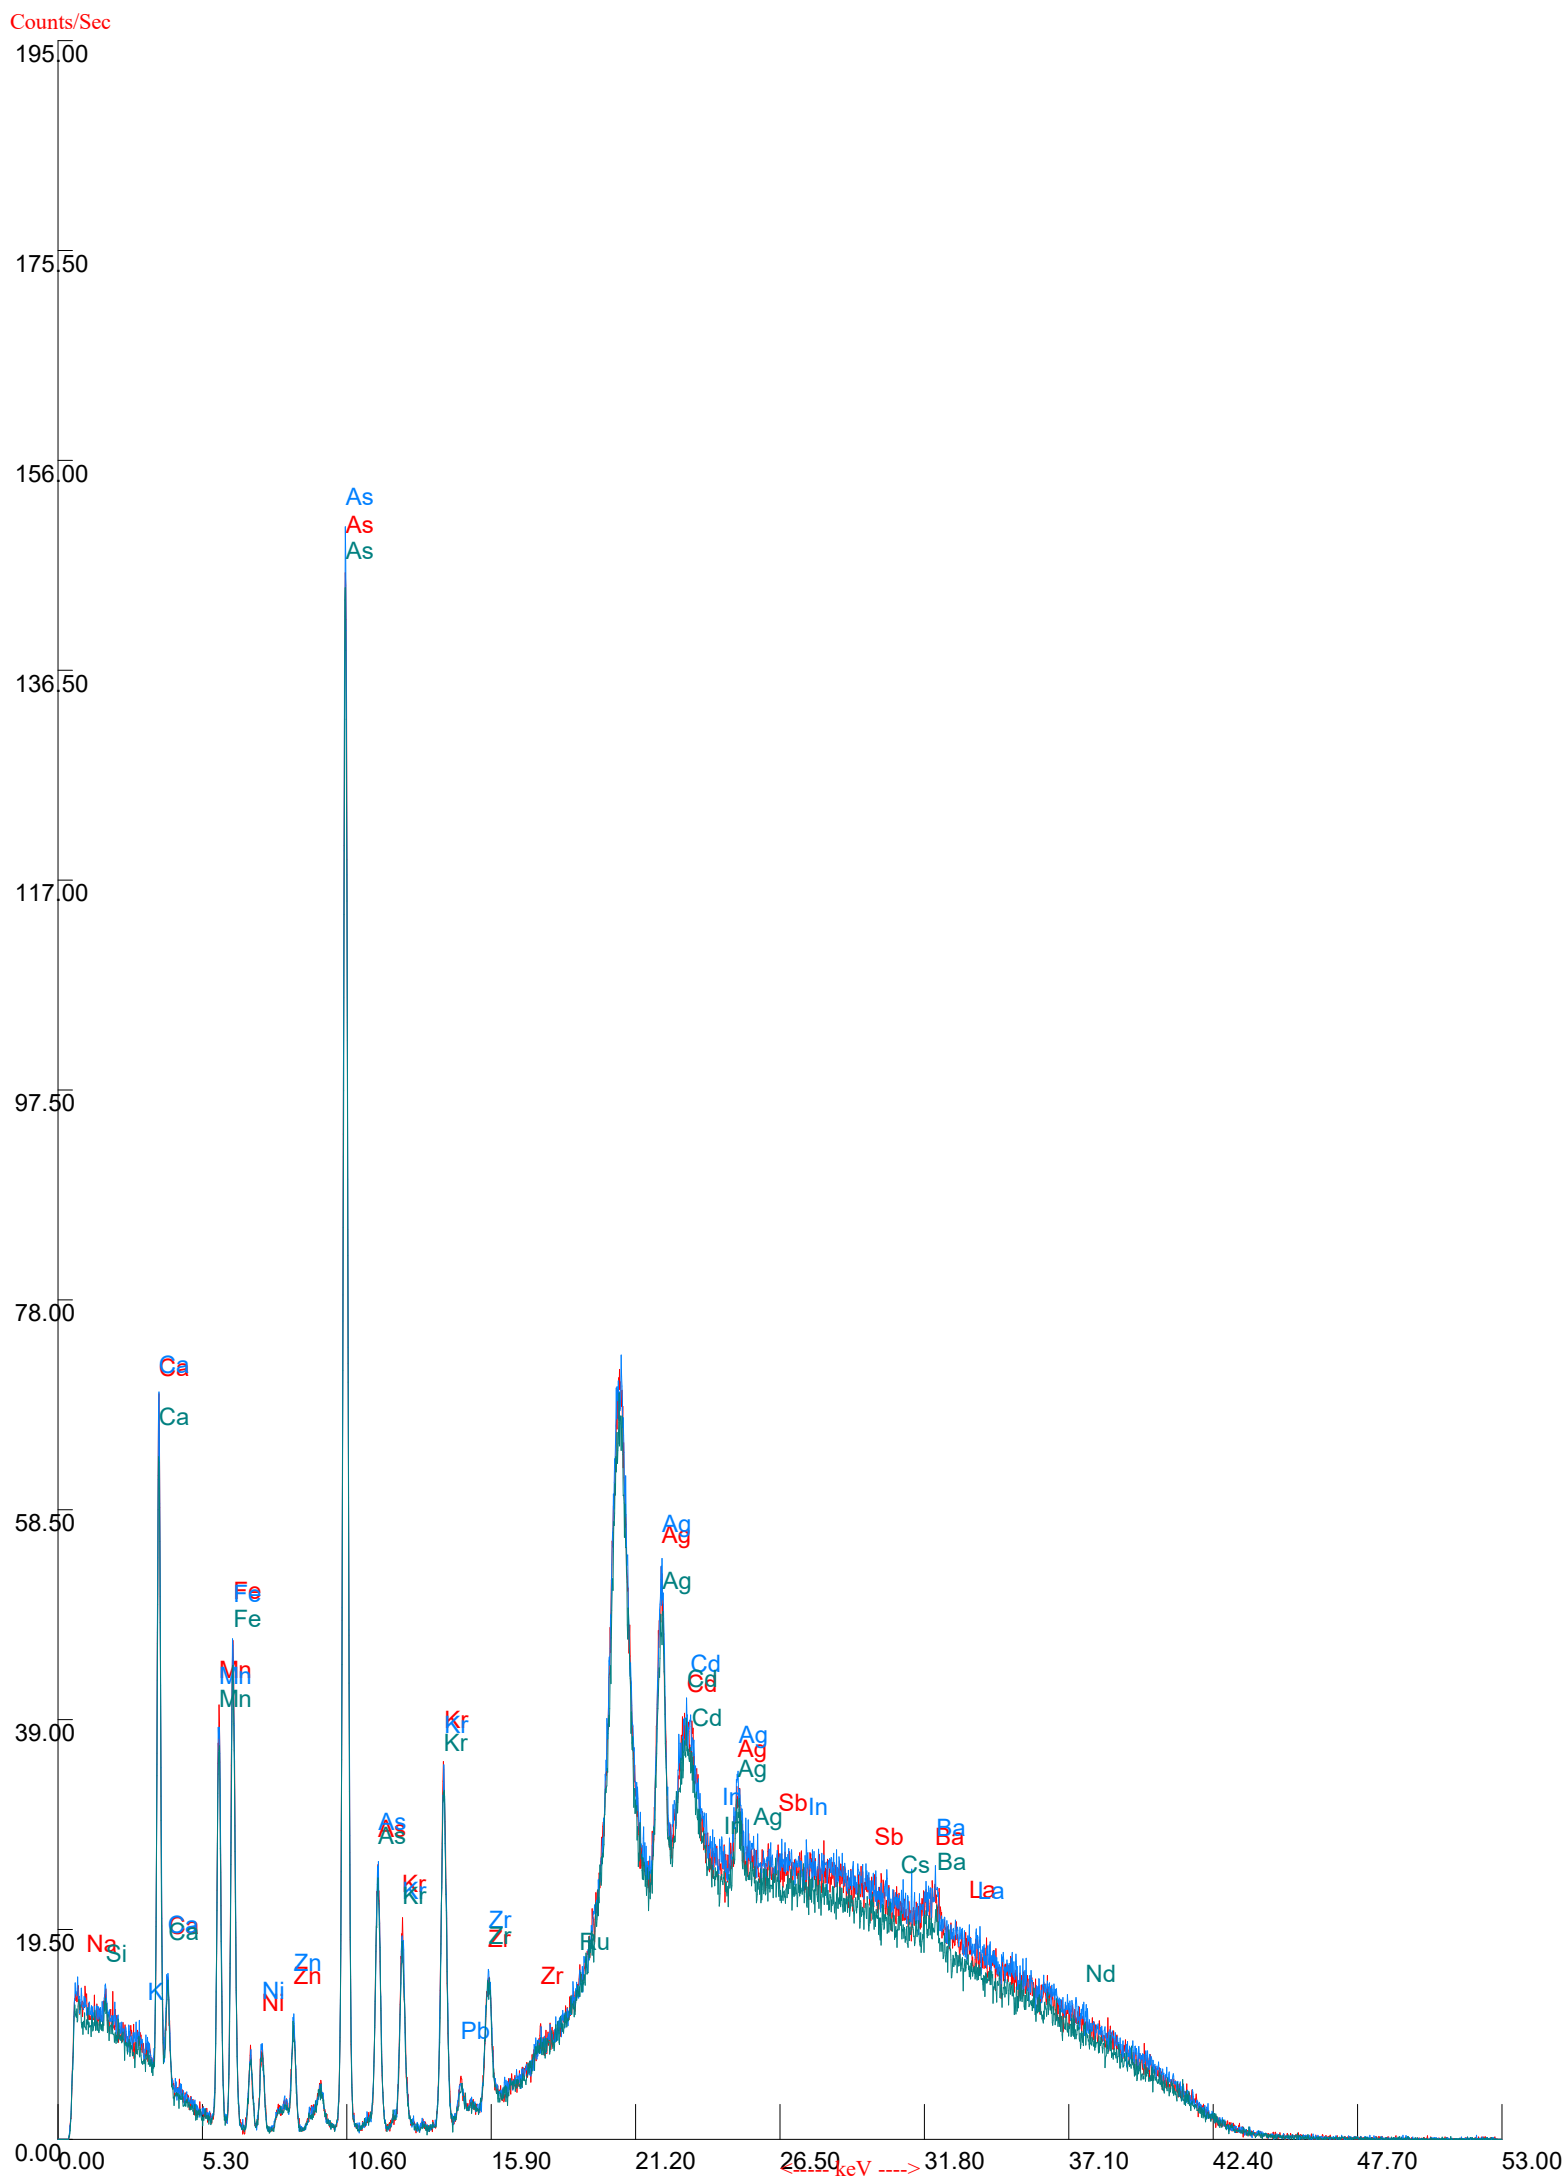

Supplement: s1 [file s1]

Counts/Sec

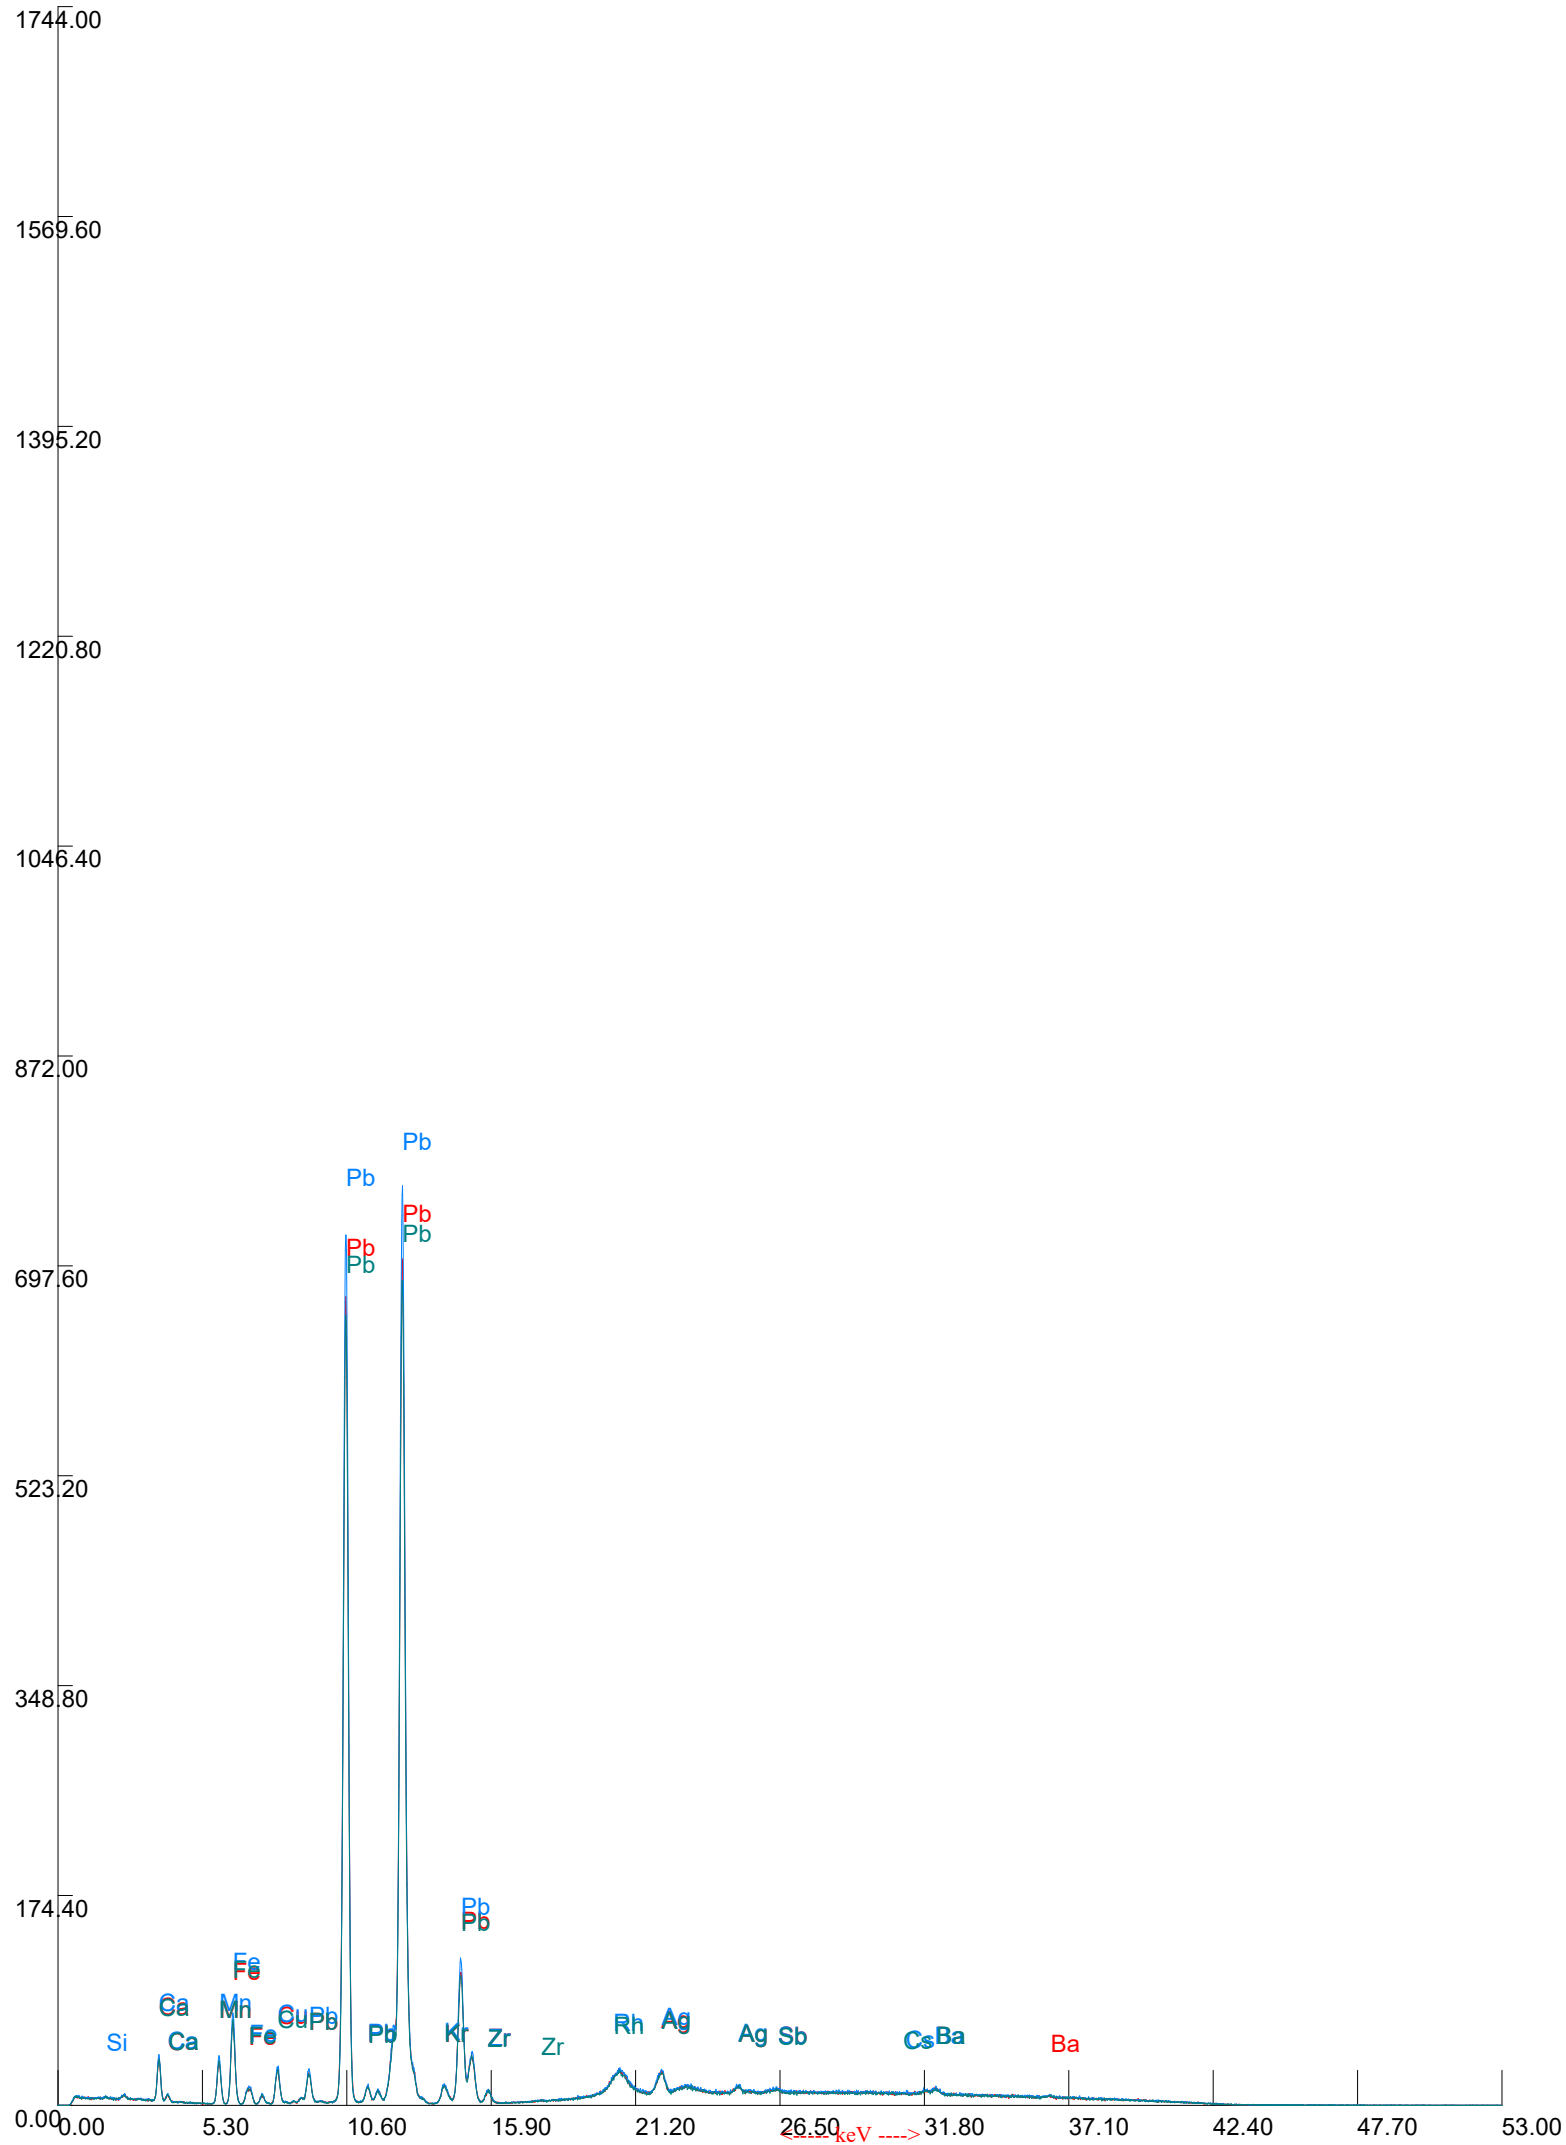

Supplement: s1 [file s1]

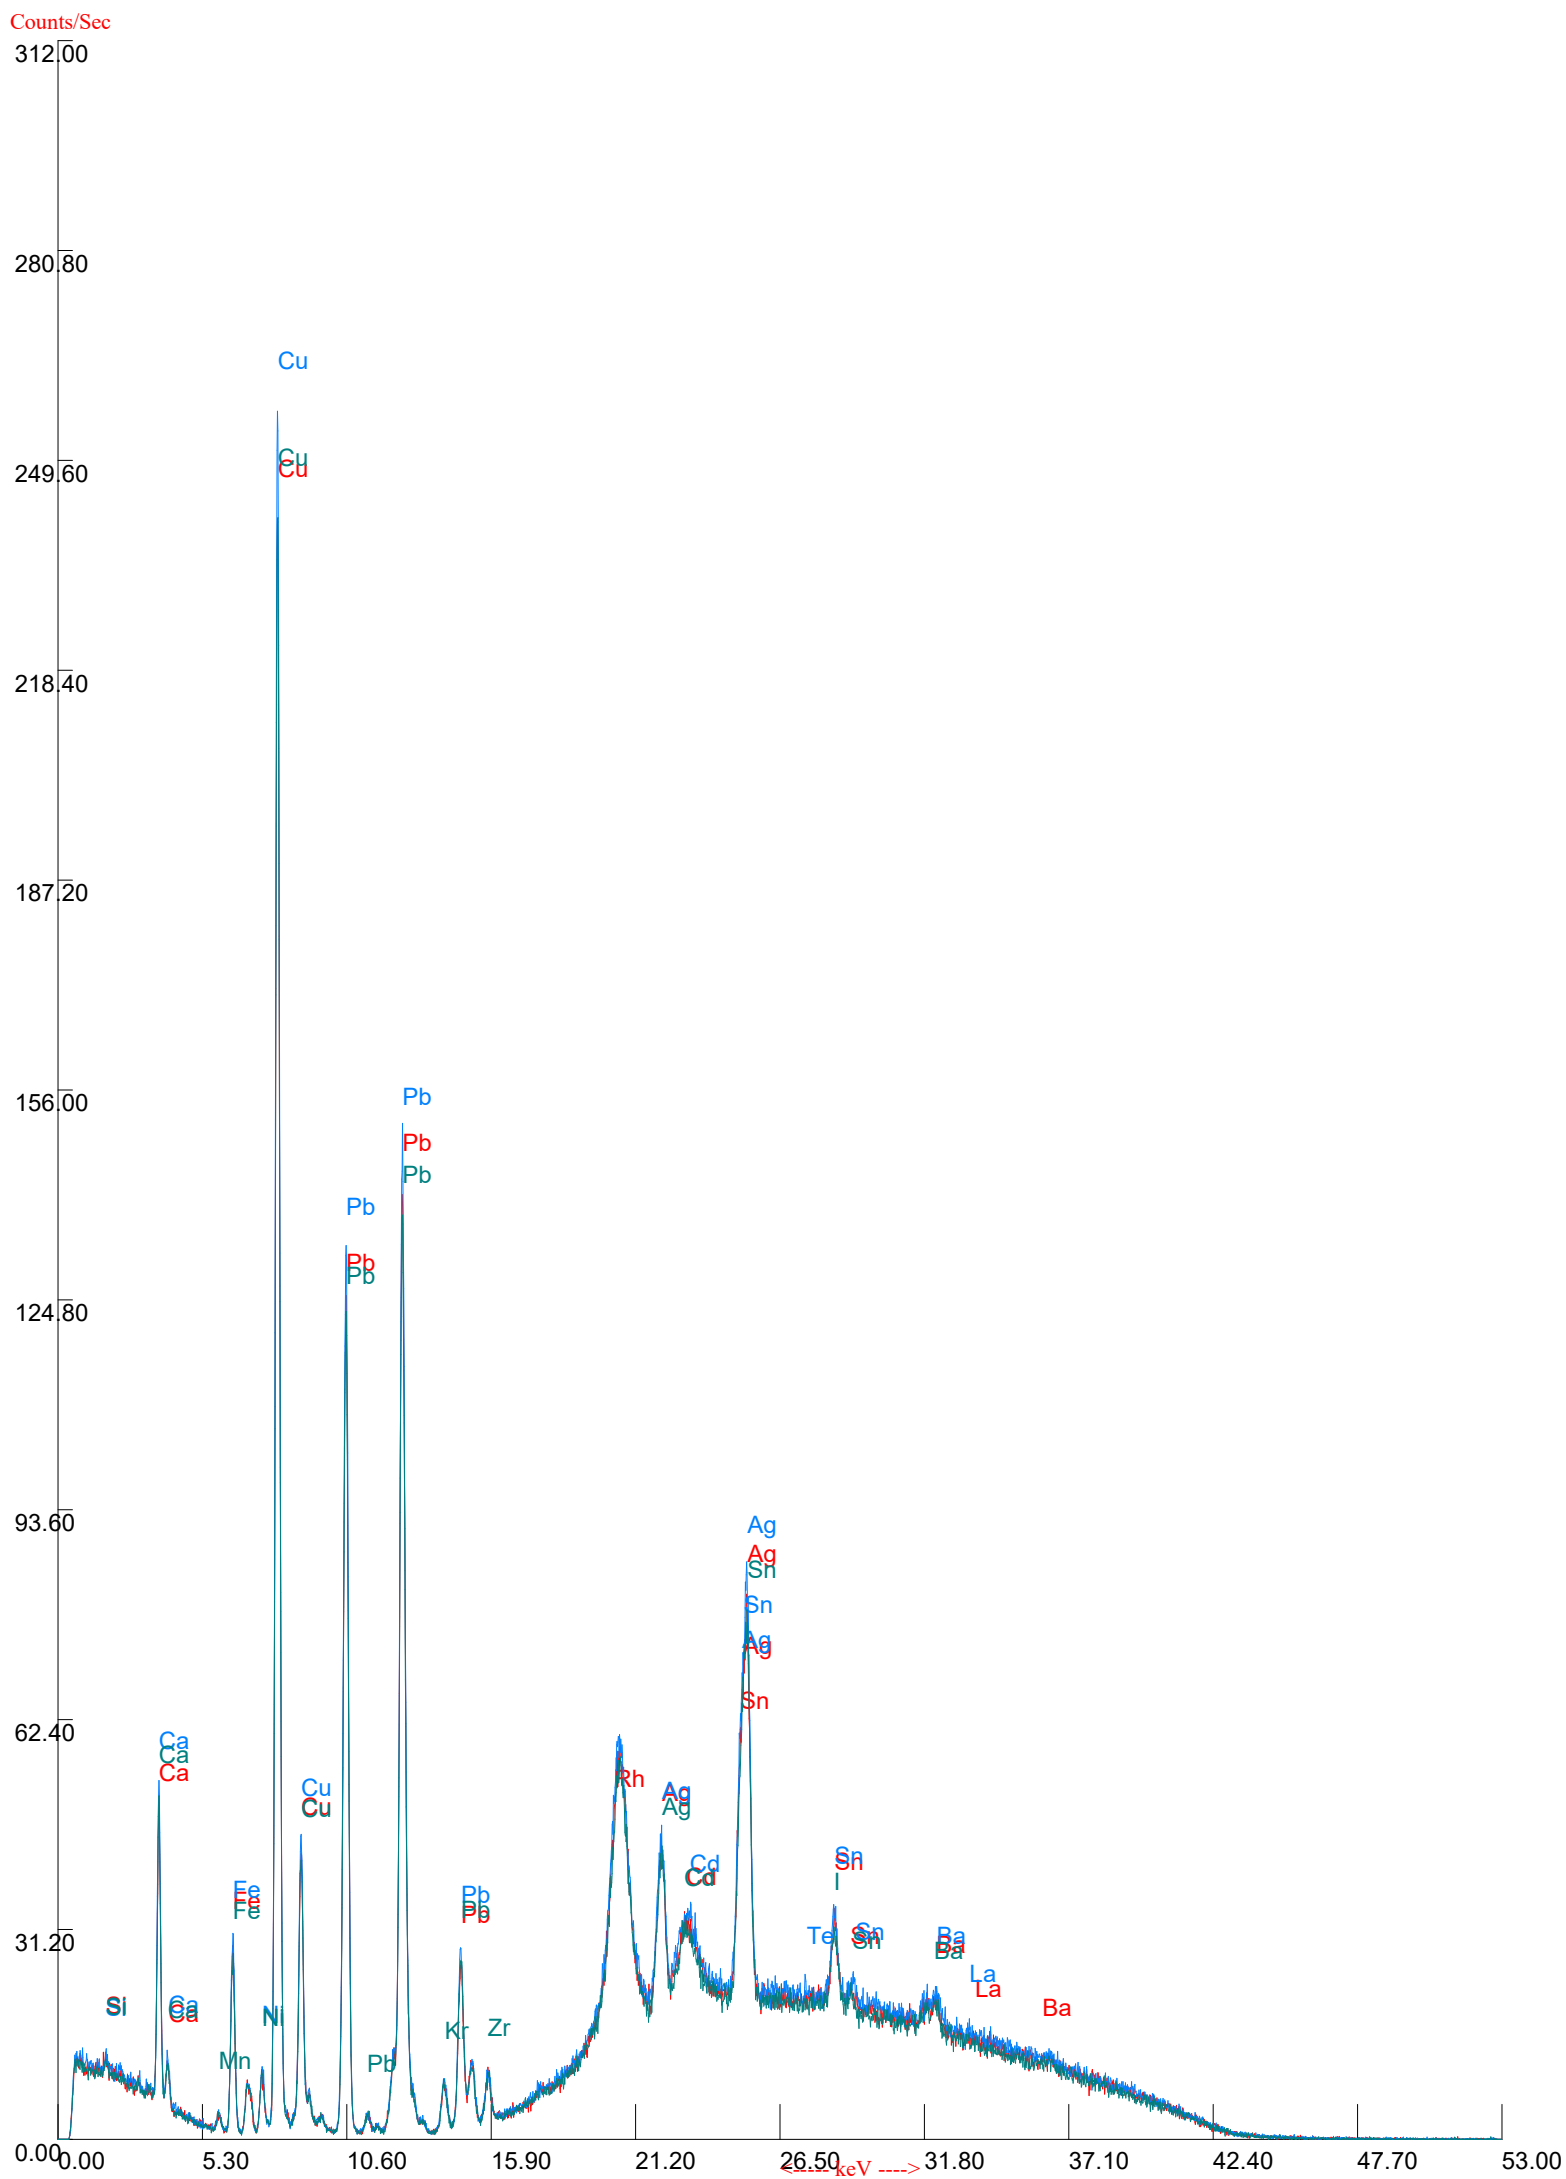

Supplement: s1 [file s1]

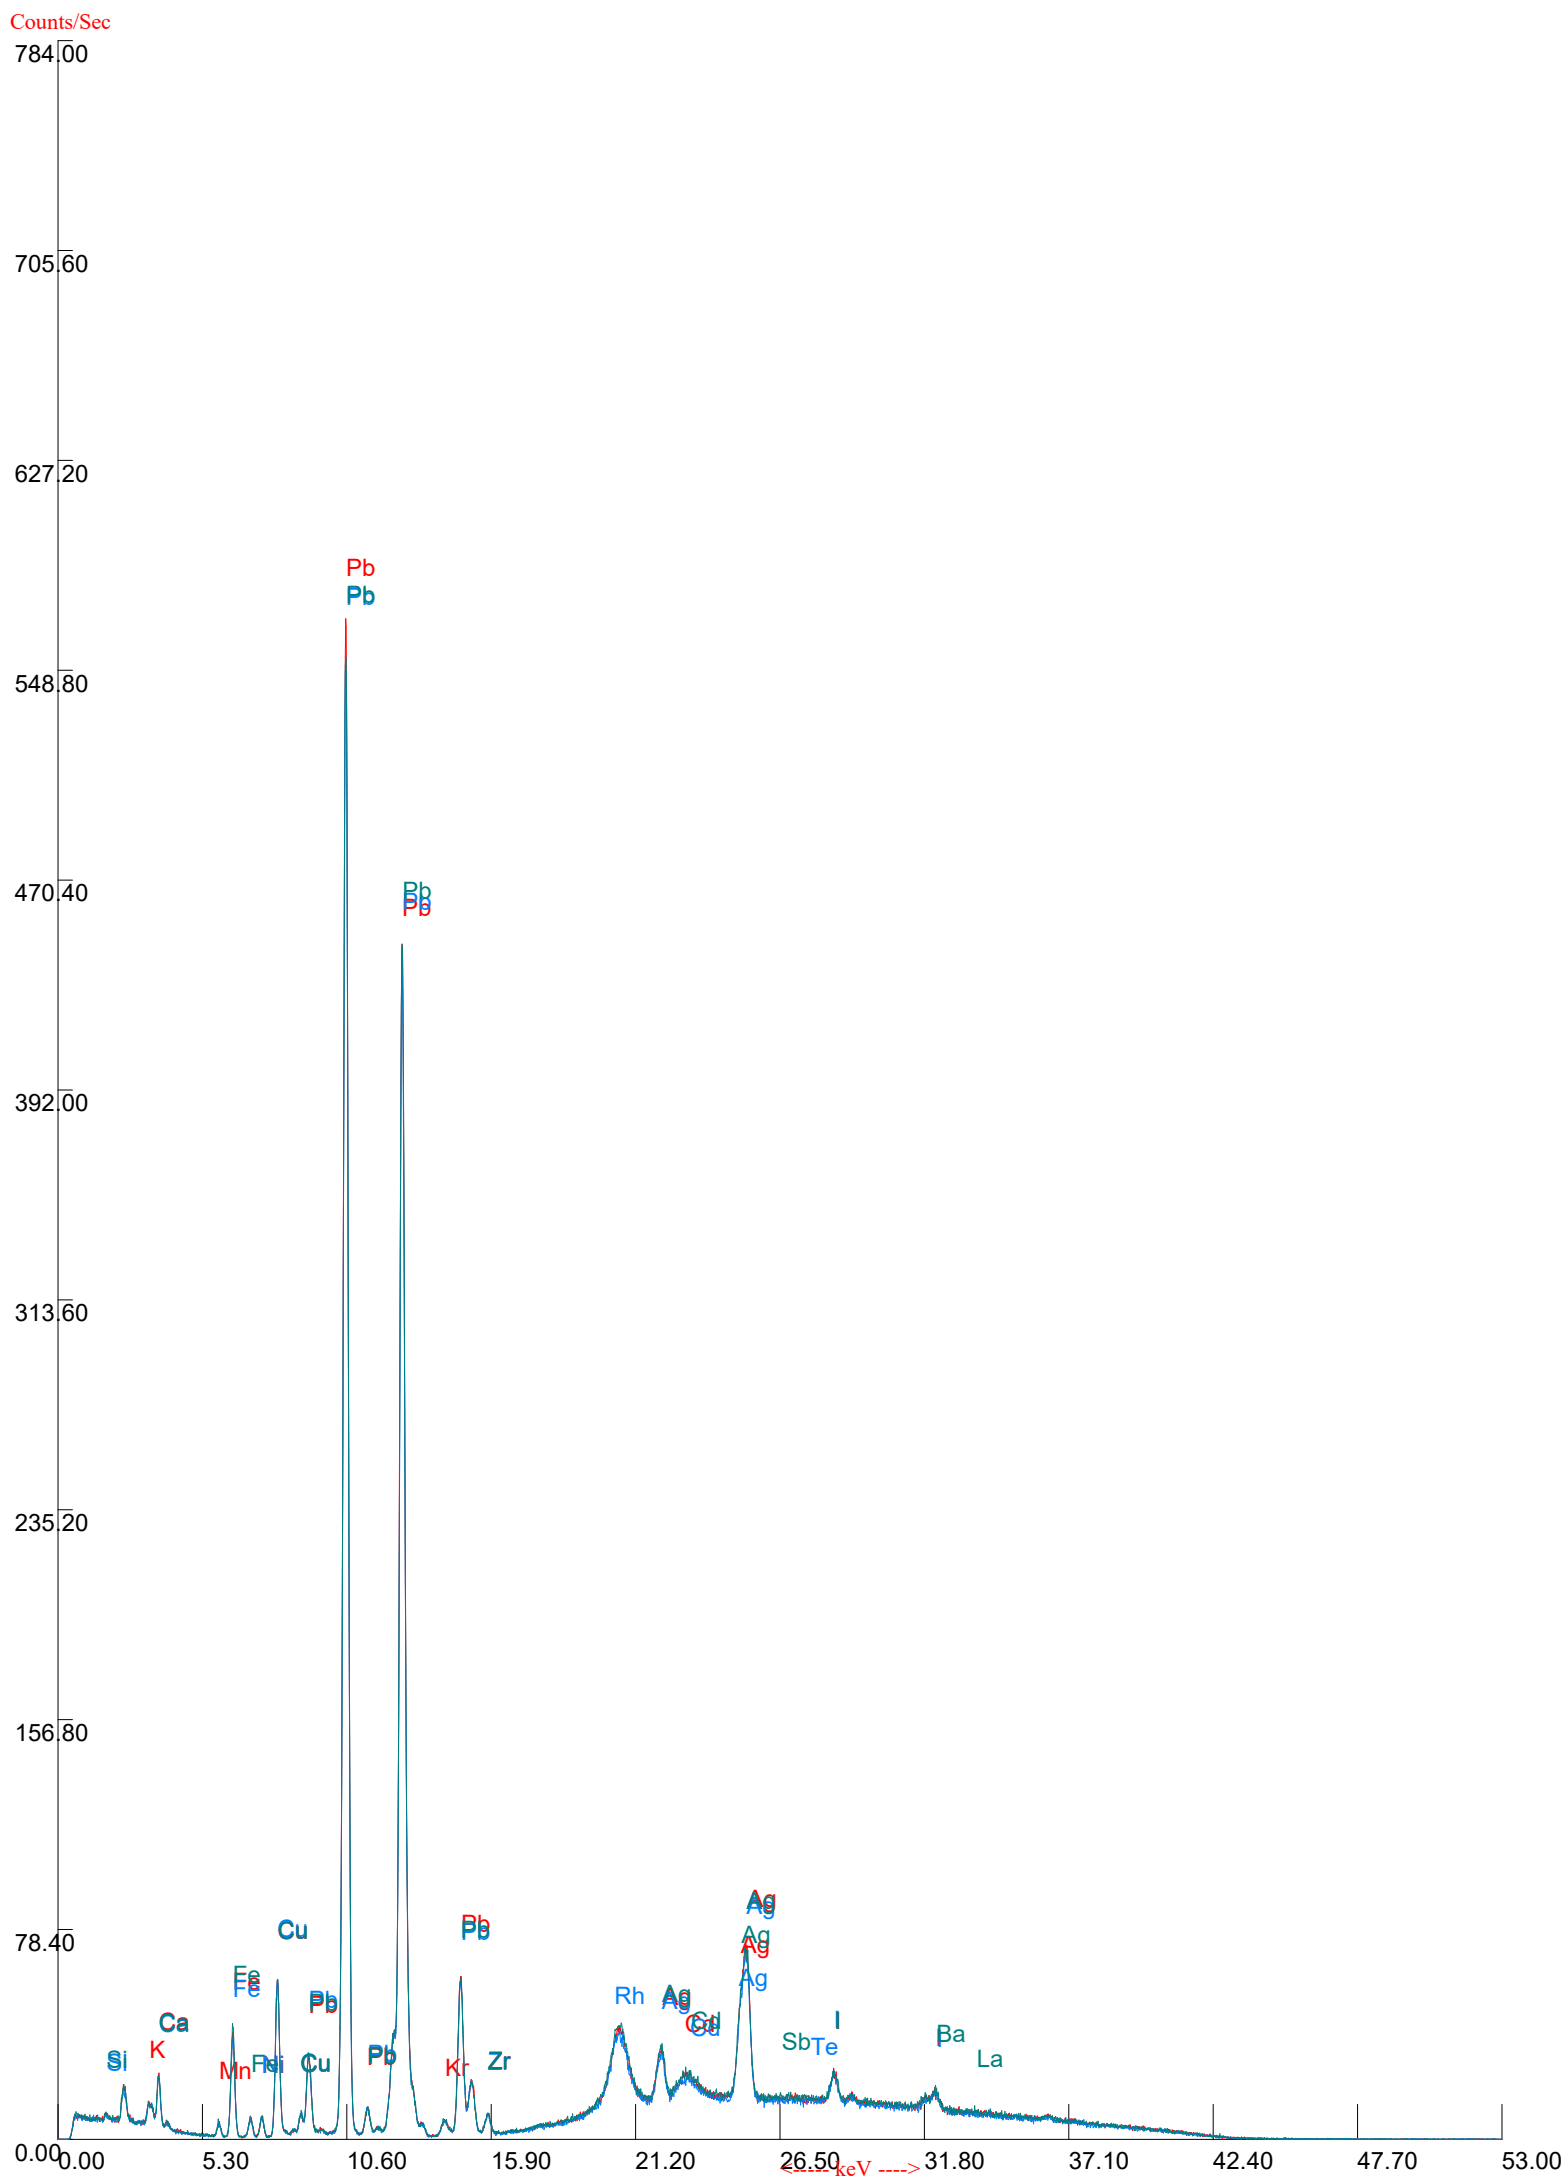

Supplement: s1 [file s1]

Counts/Sec

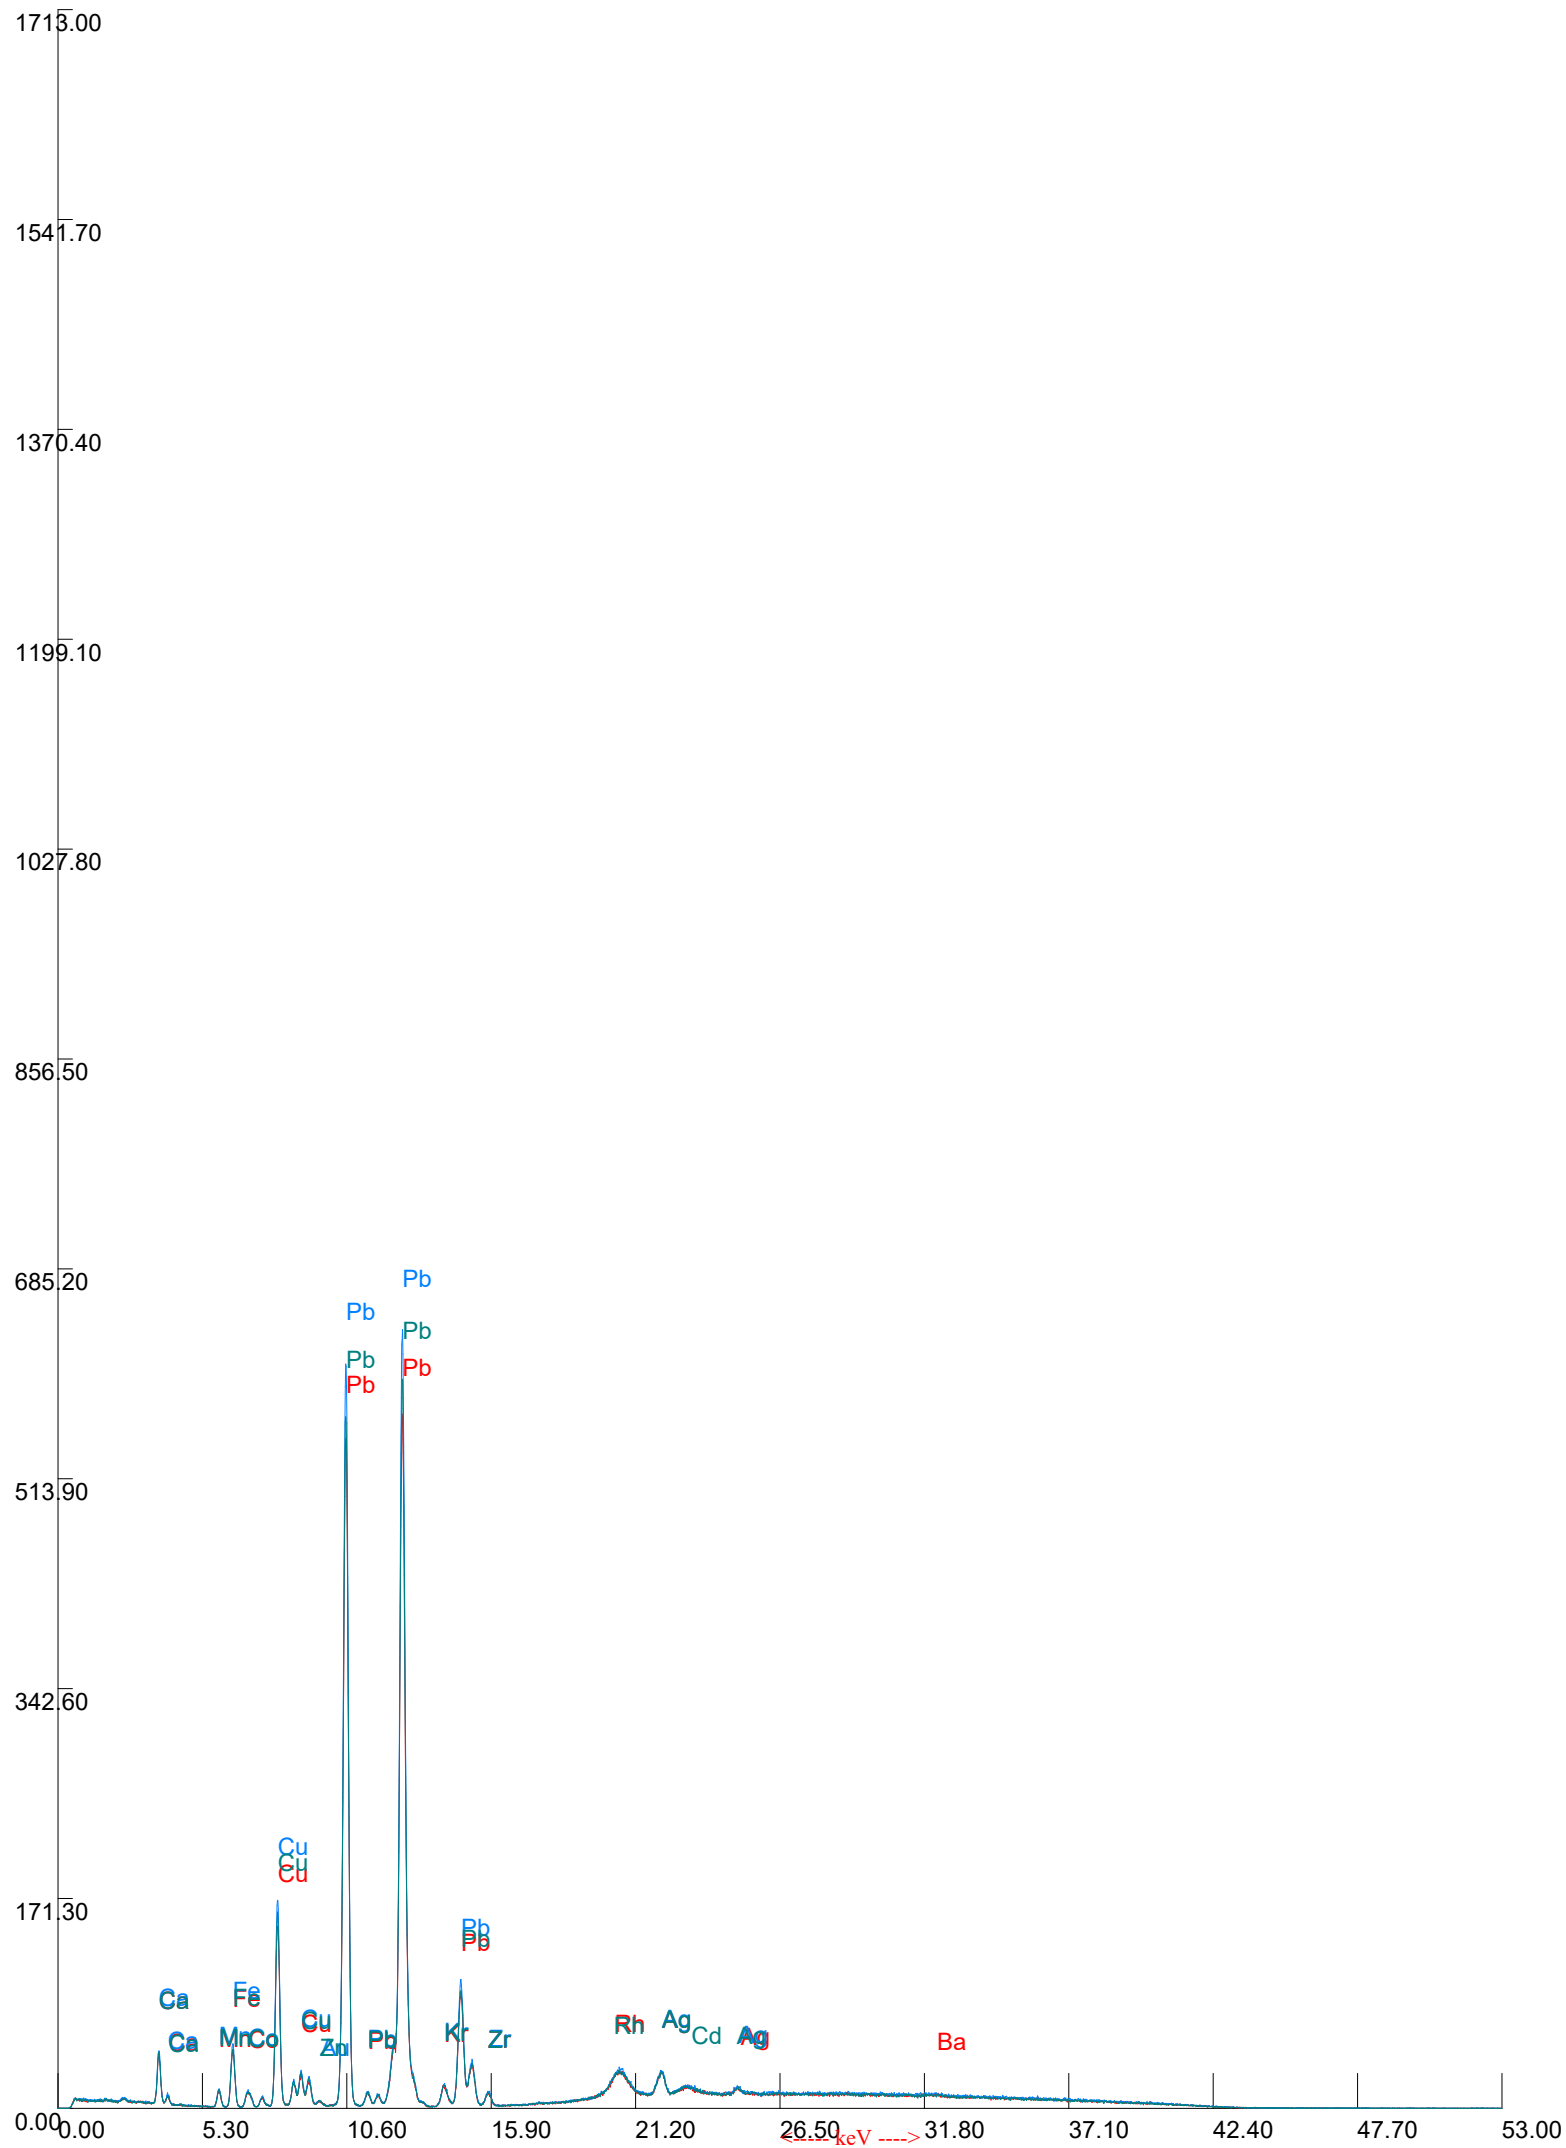

Supplement: s1 [file s1]

Counts/Sec

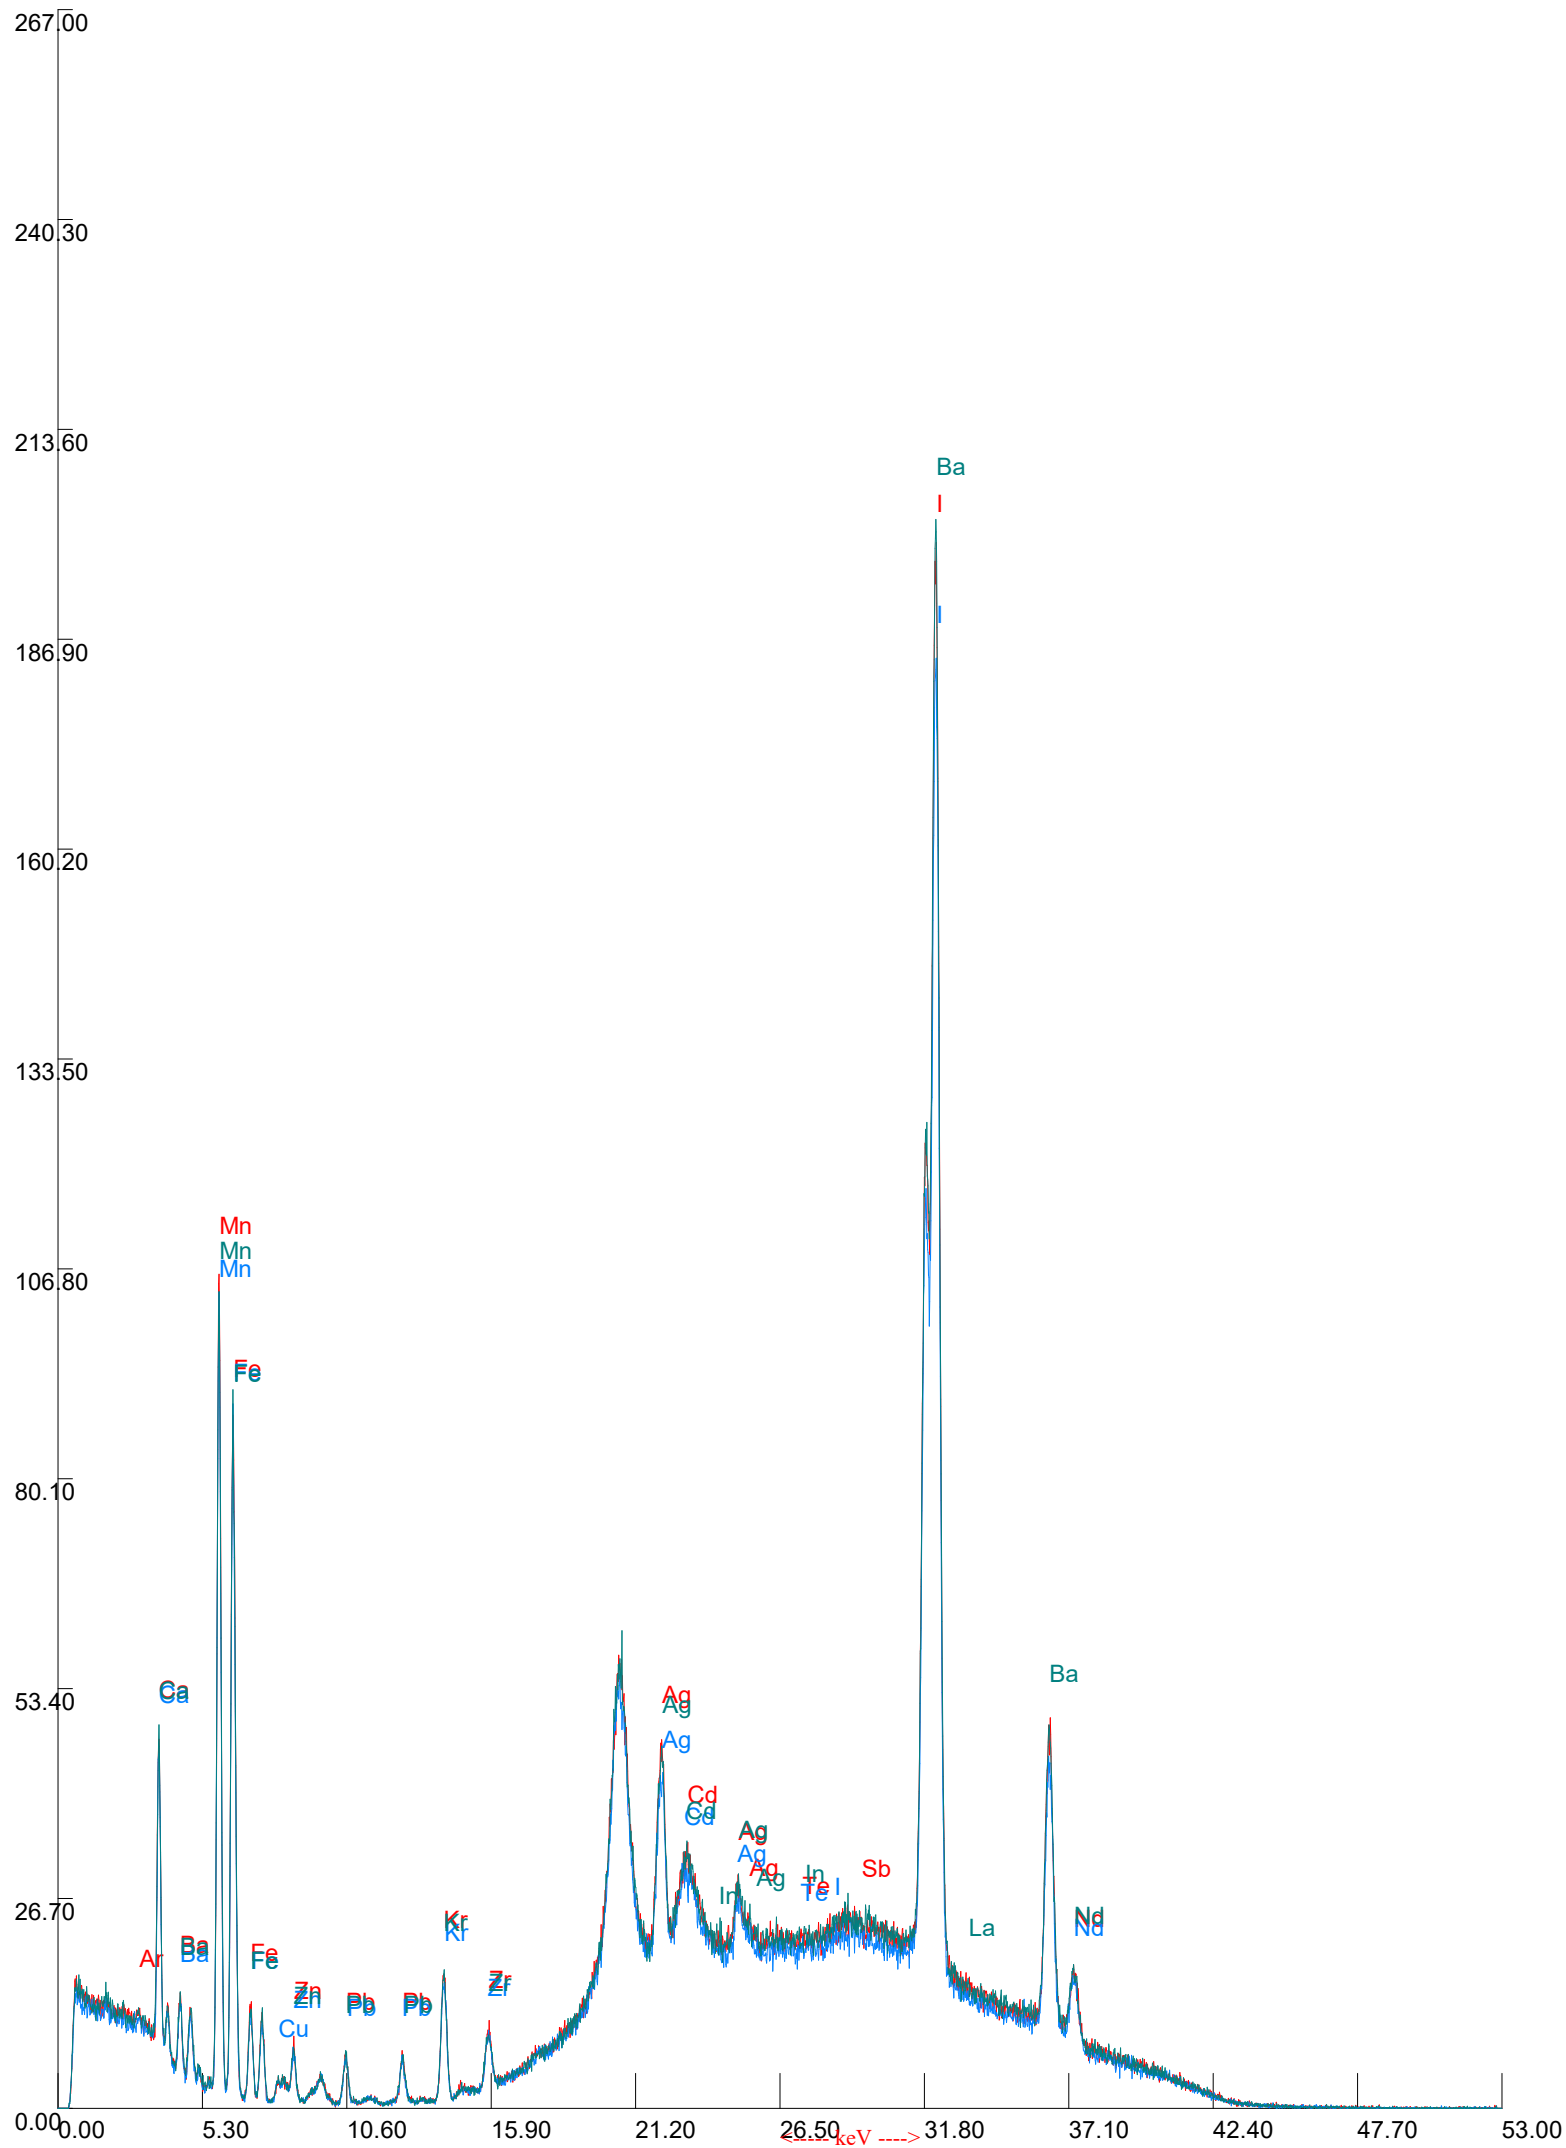

Supplement: s1 [file s1]

Counts/Sec

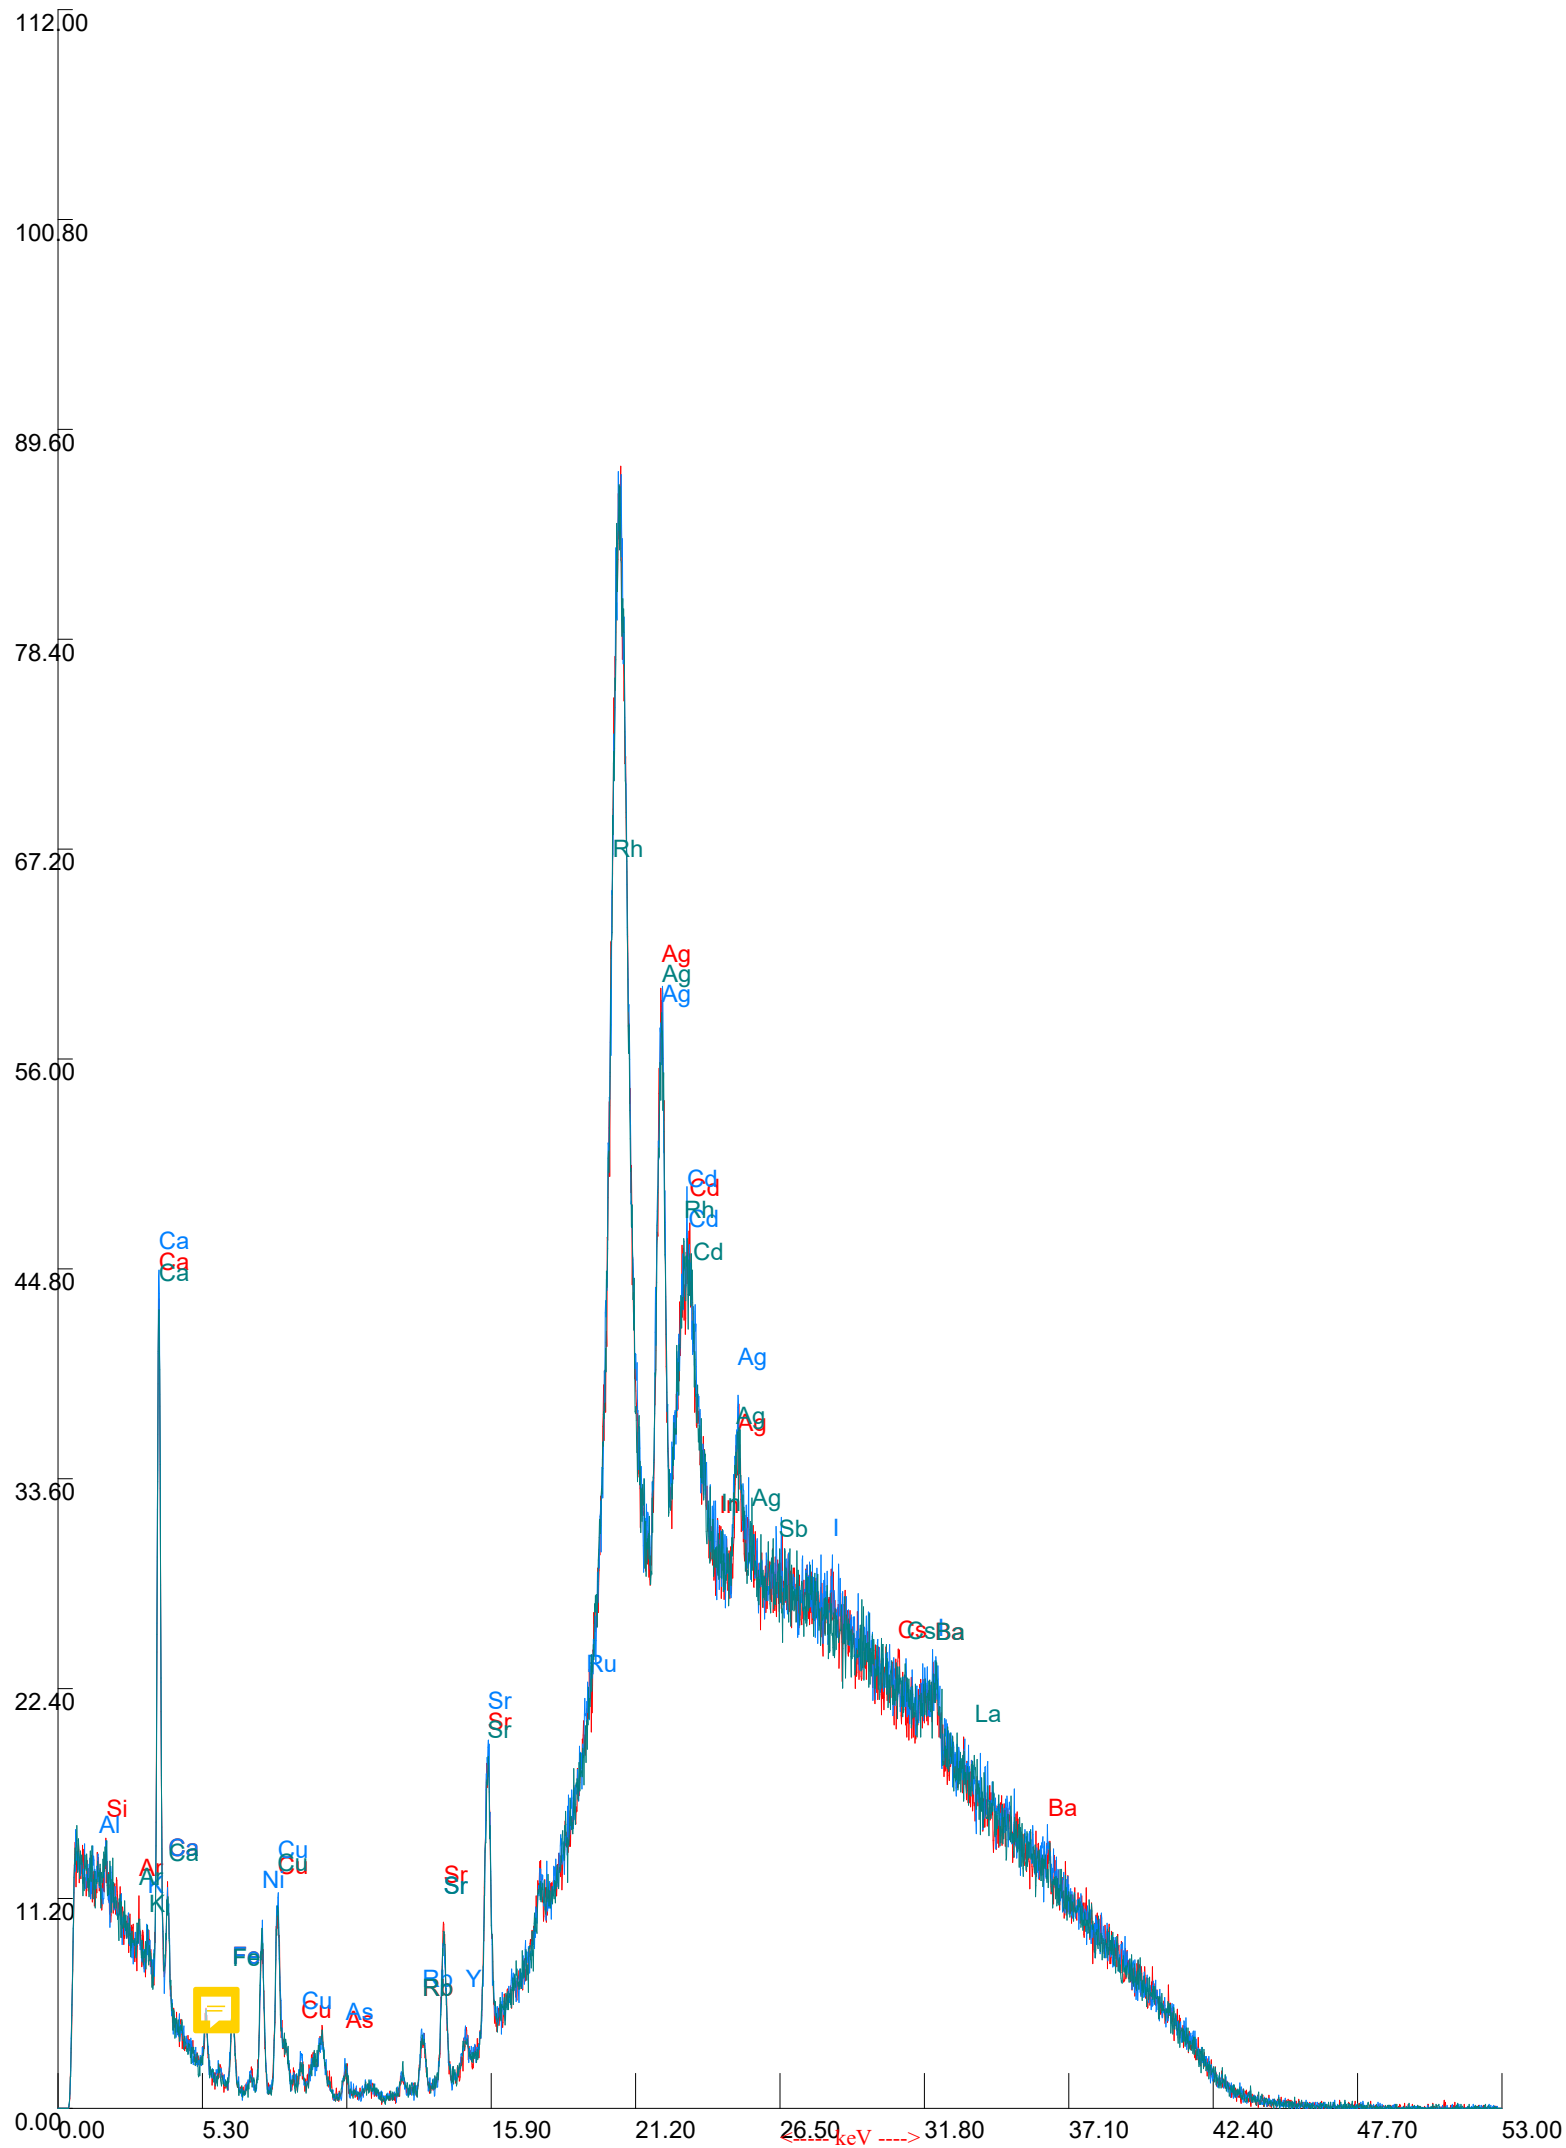

Supplement: s1 [file s1]

Counts/Sec

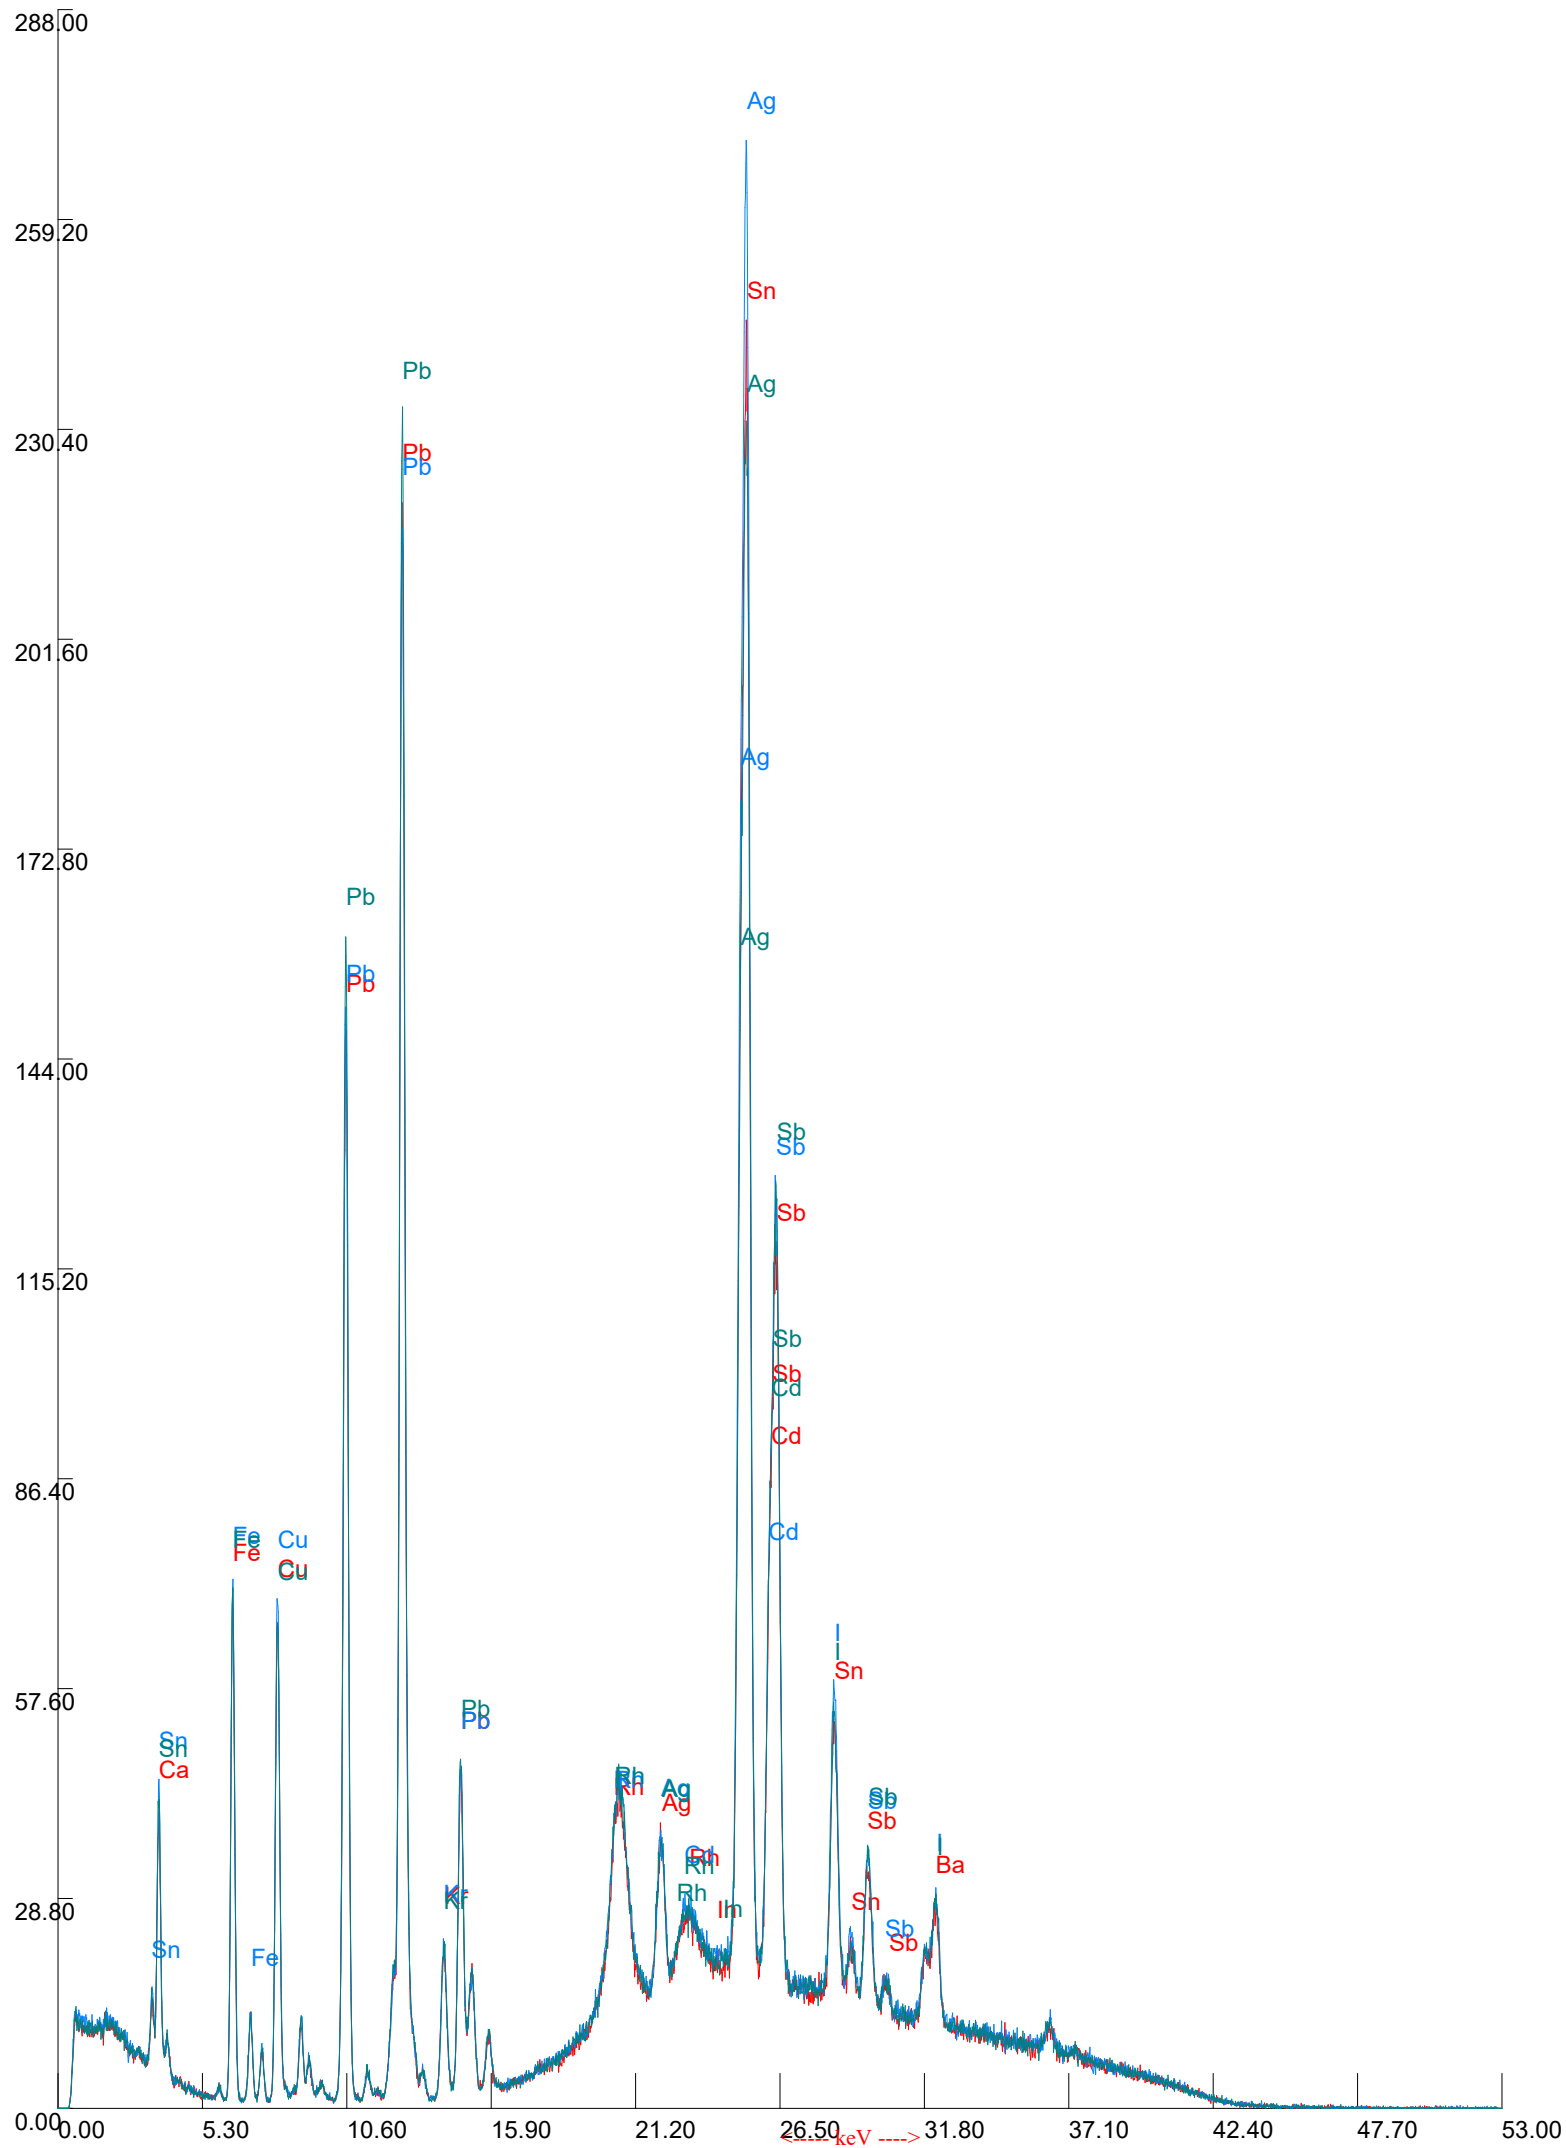

Supplement: s1 [file s1]

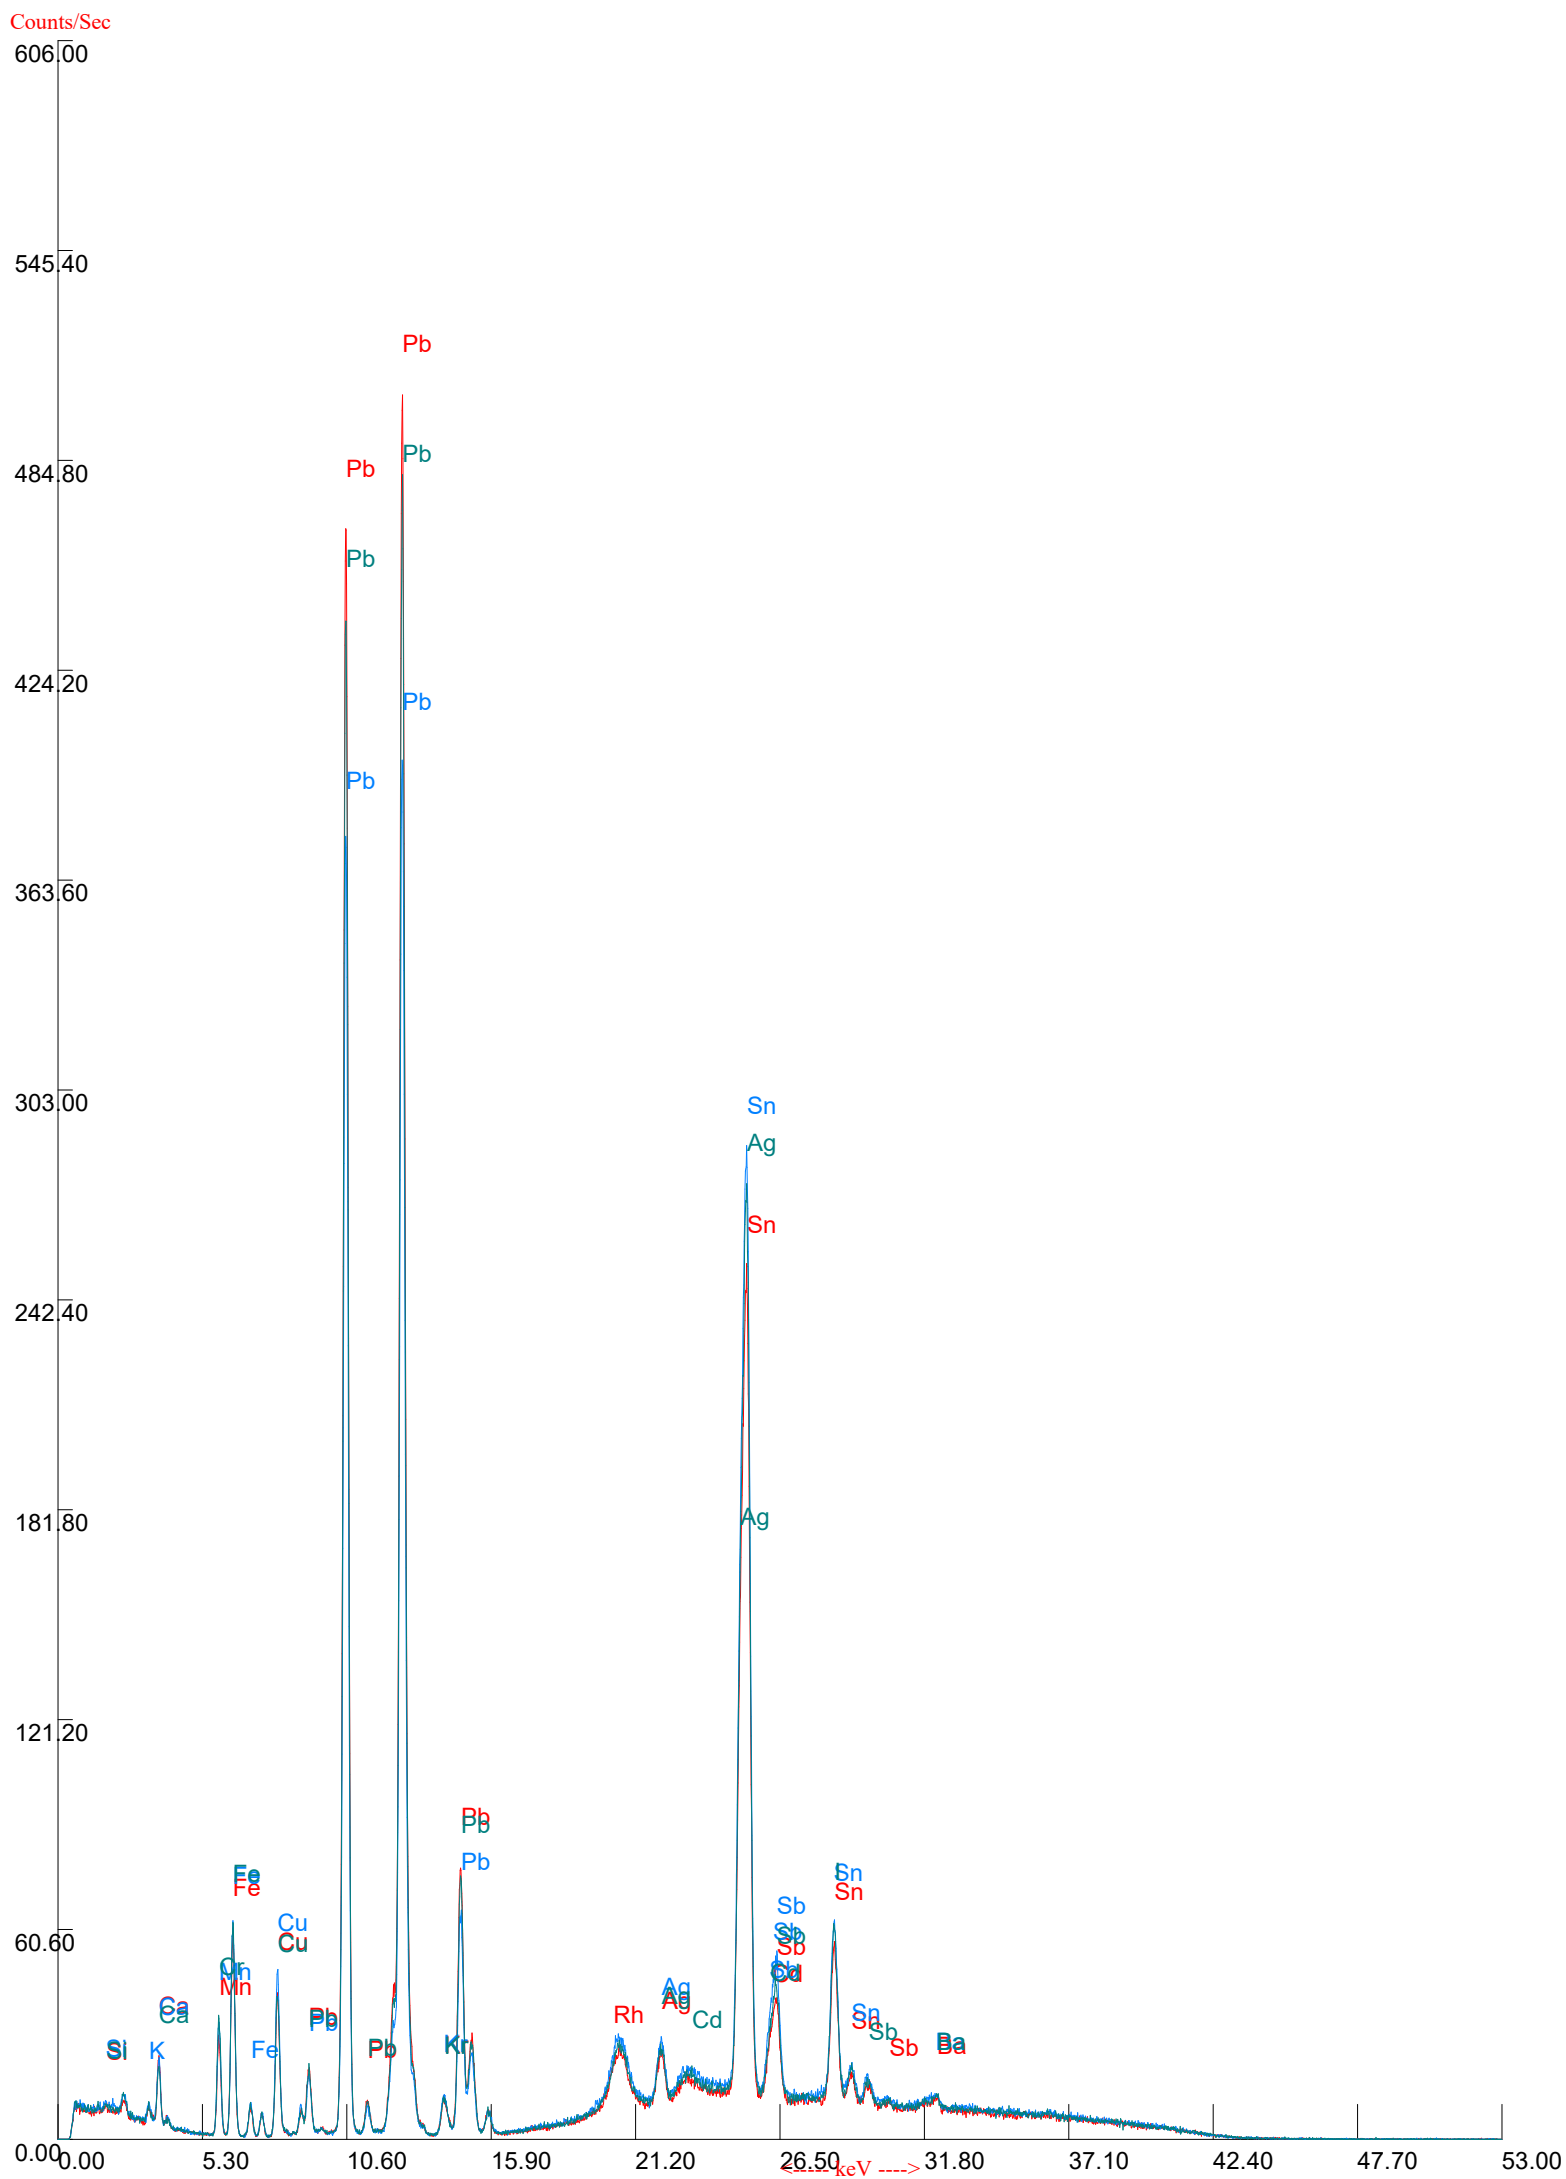

Supplement: s1 [file s1]

Counts/Sec

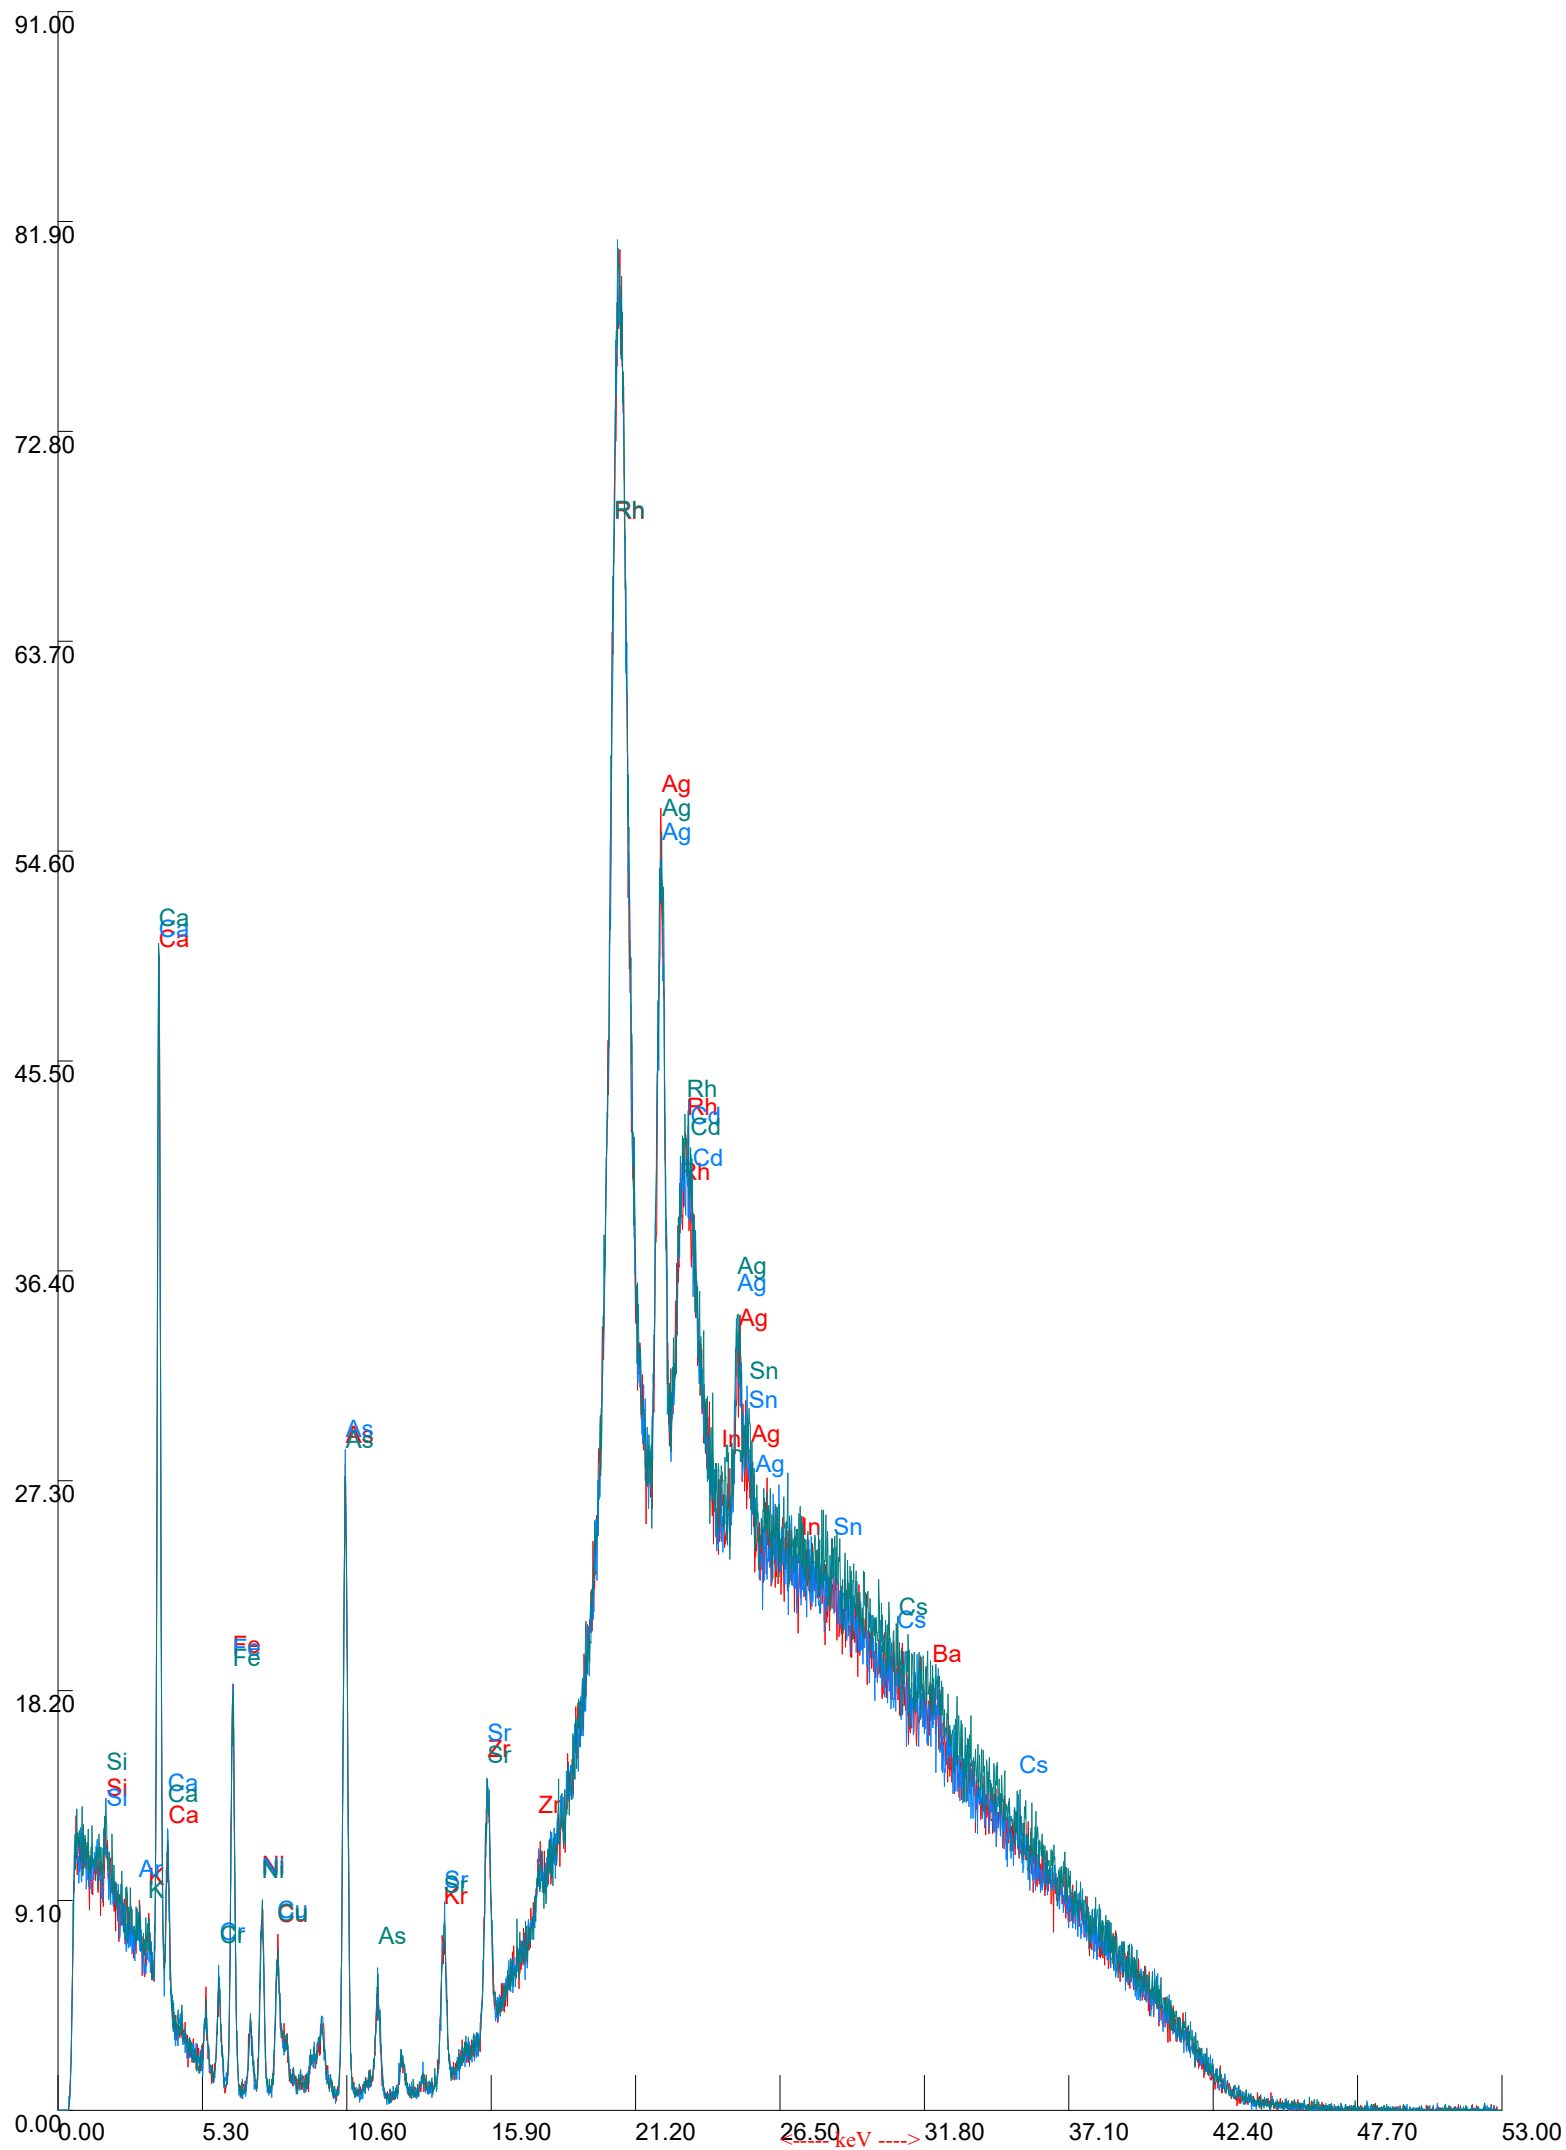

Supplement: s1 [file s1]

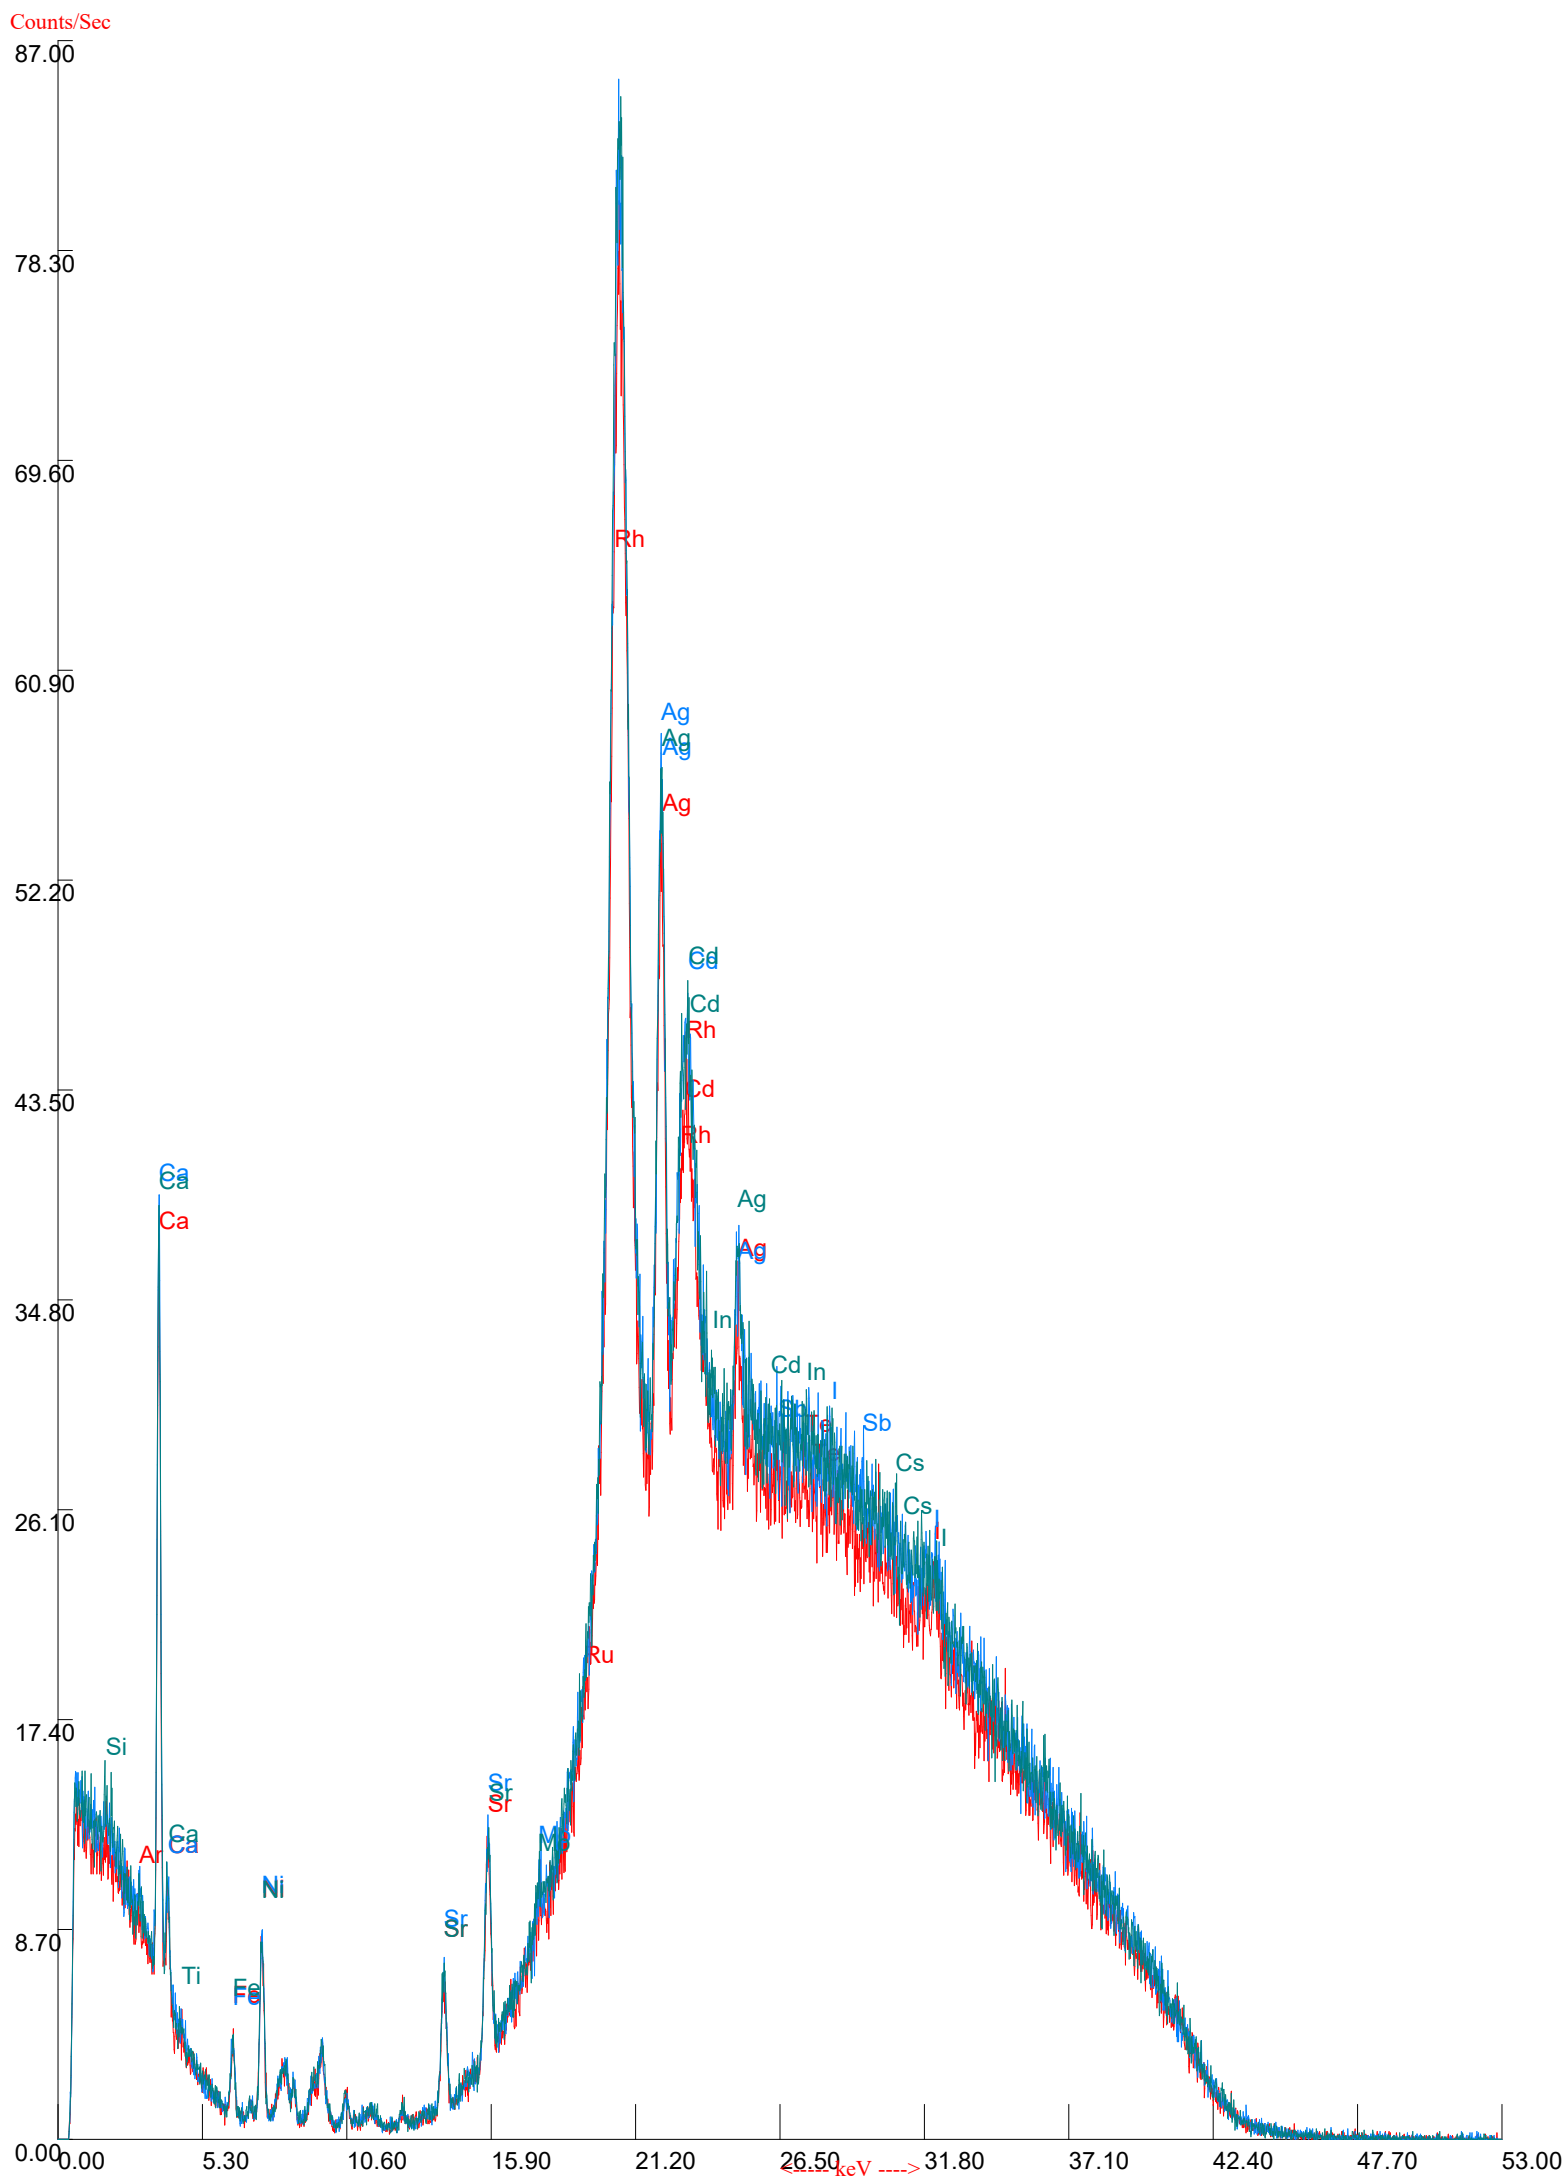

Supplement: s1 [file s1]

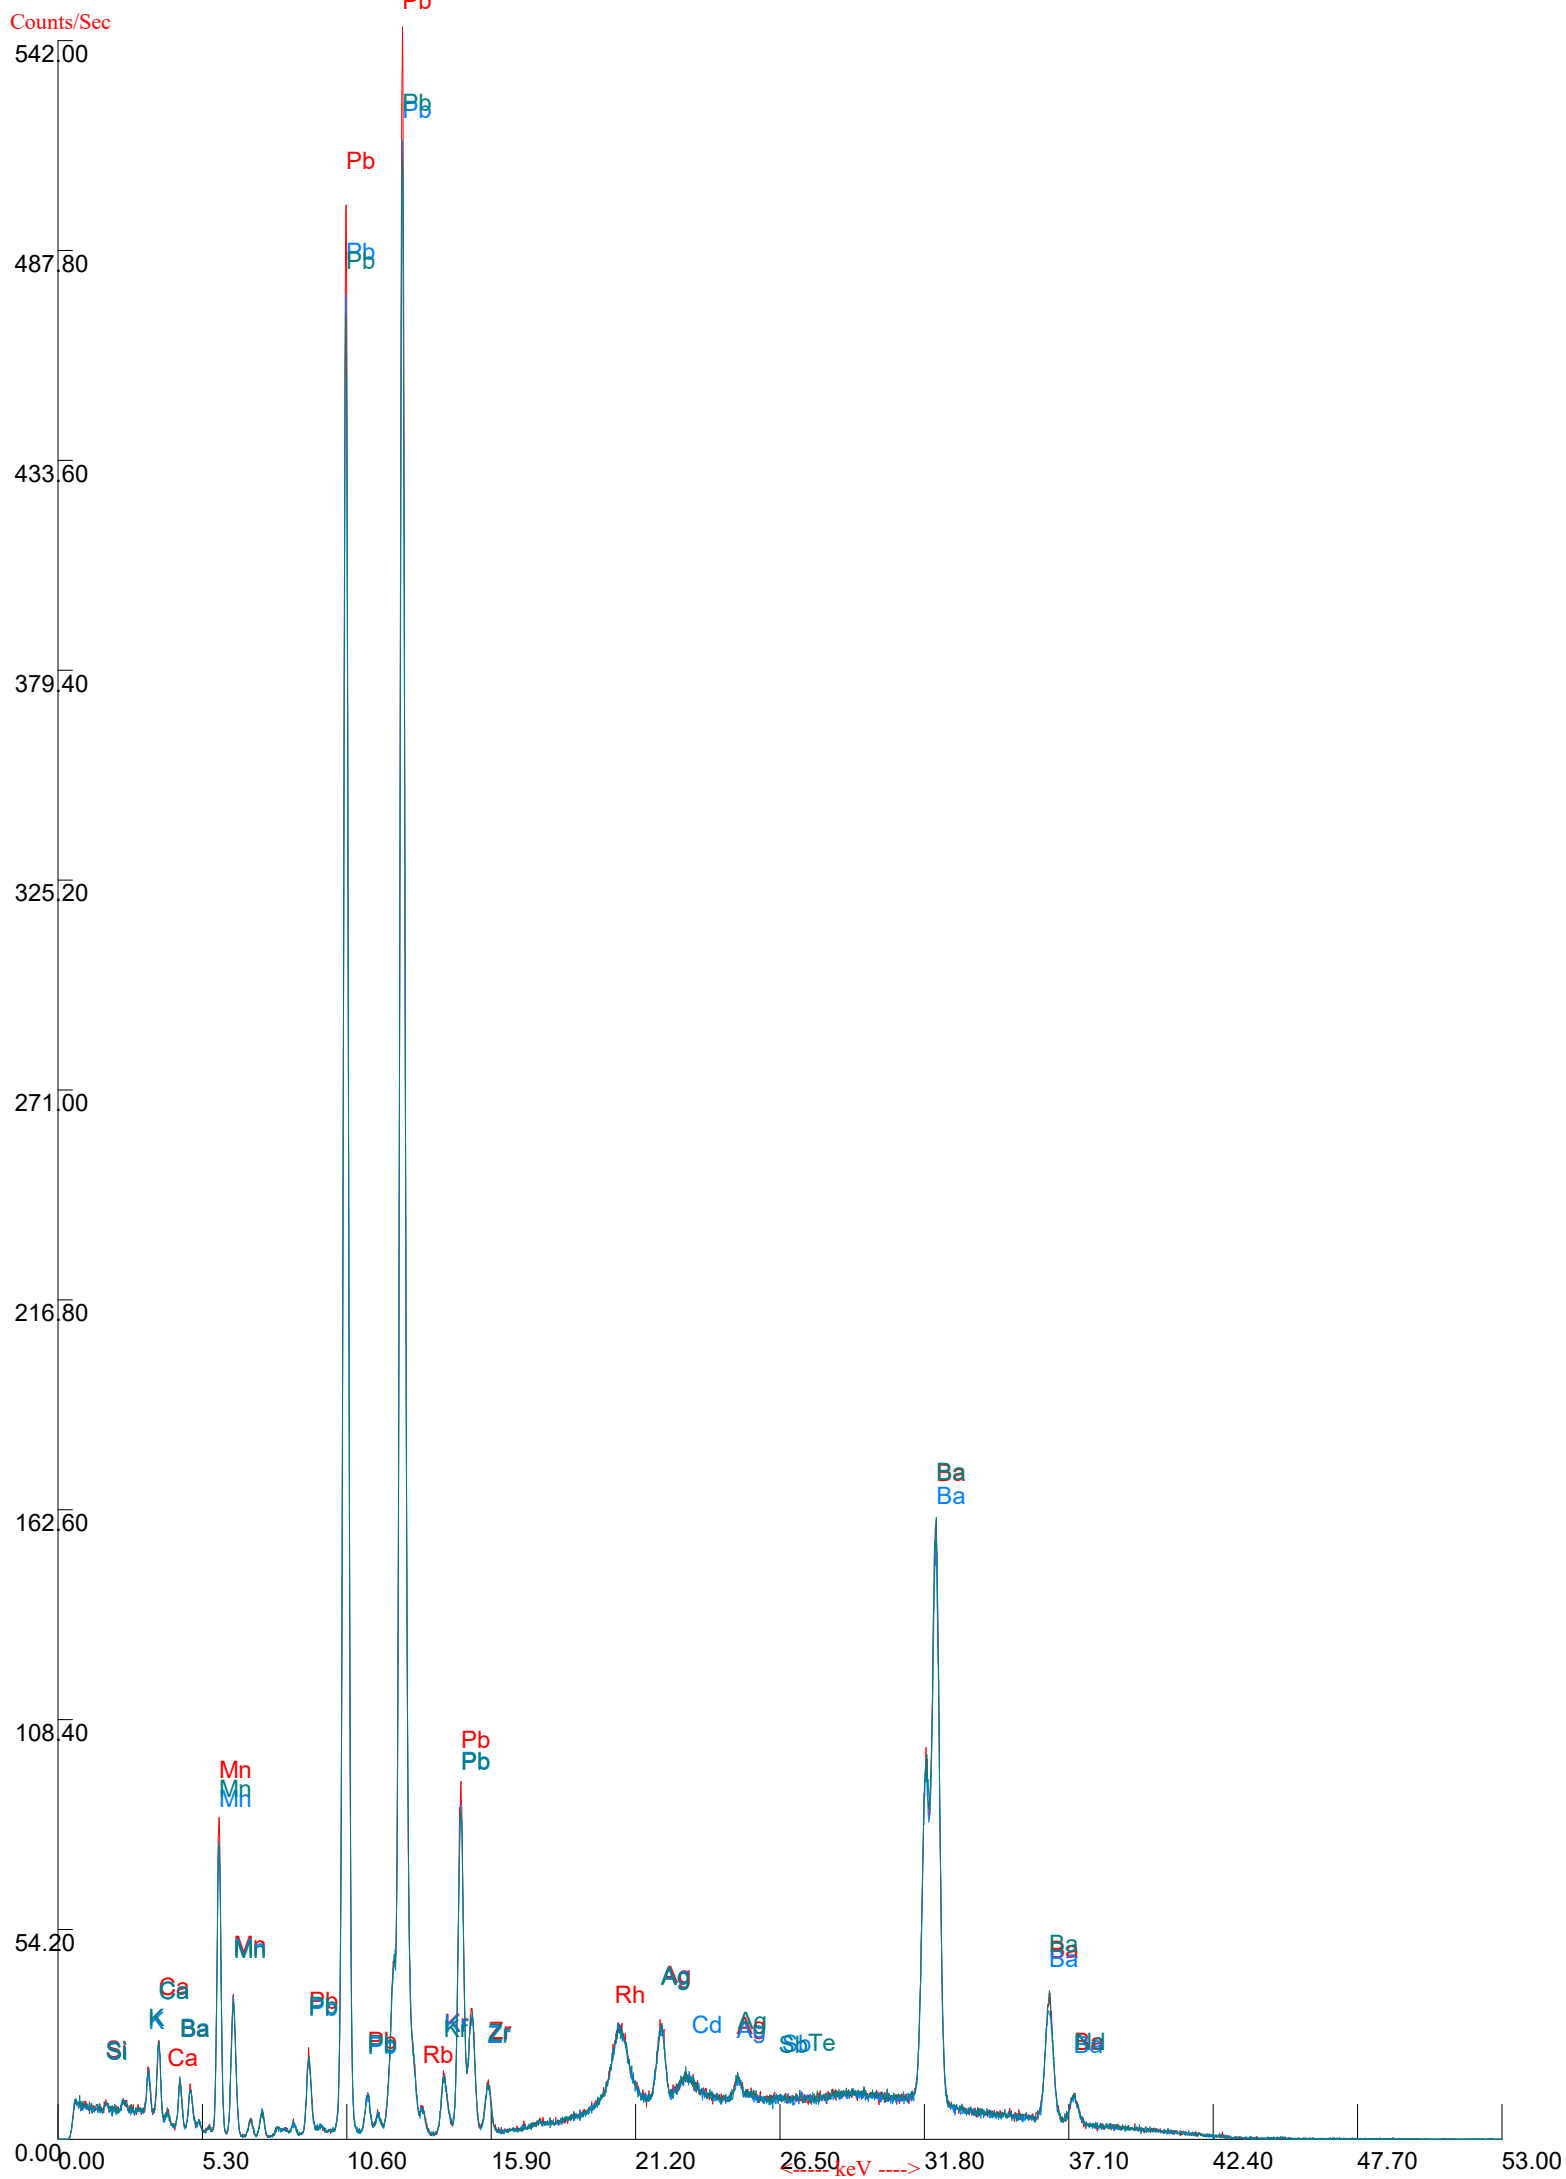

Supplement: s1 [file s1]

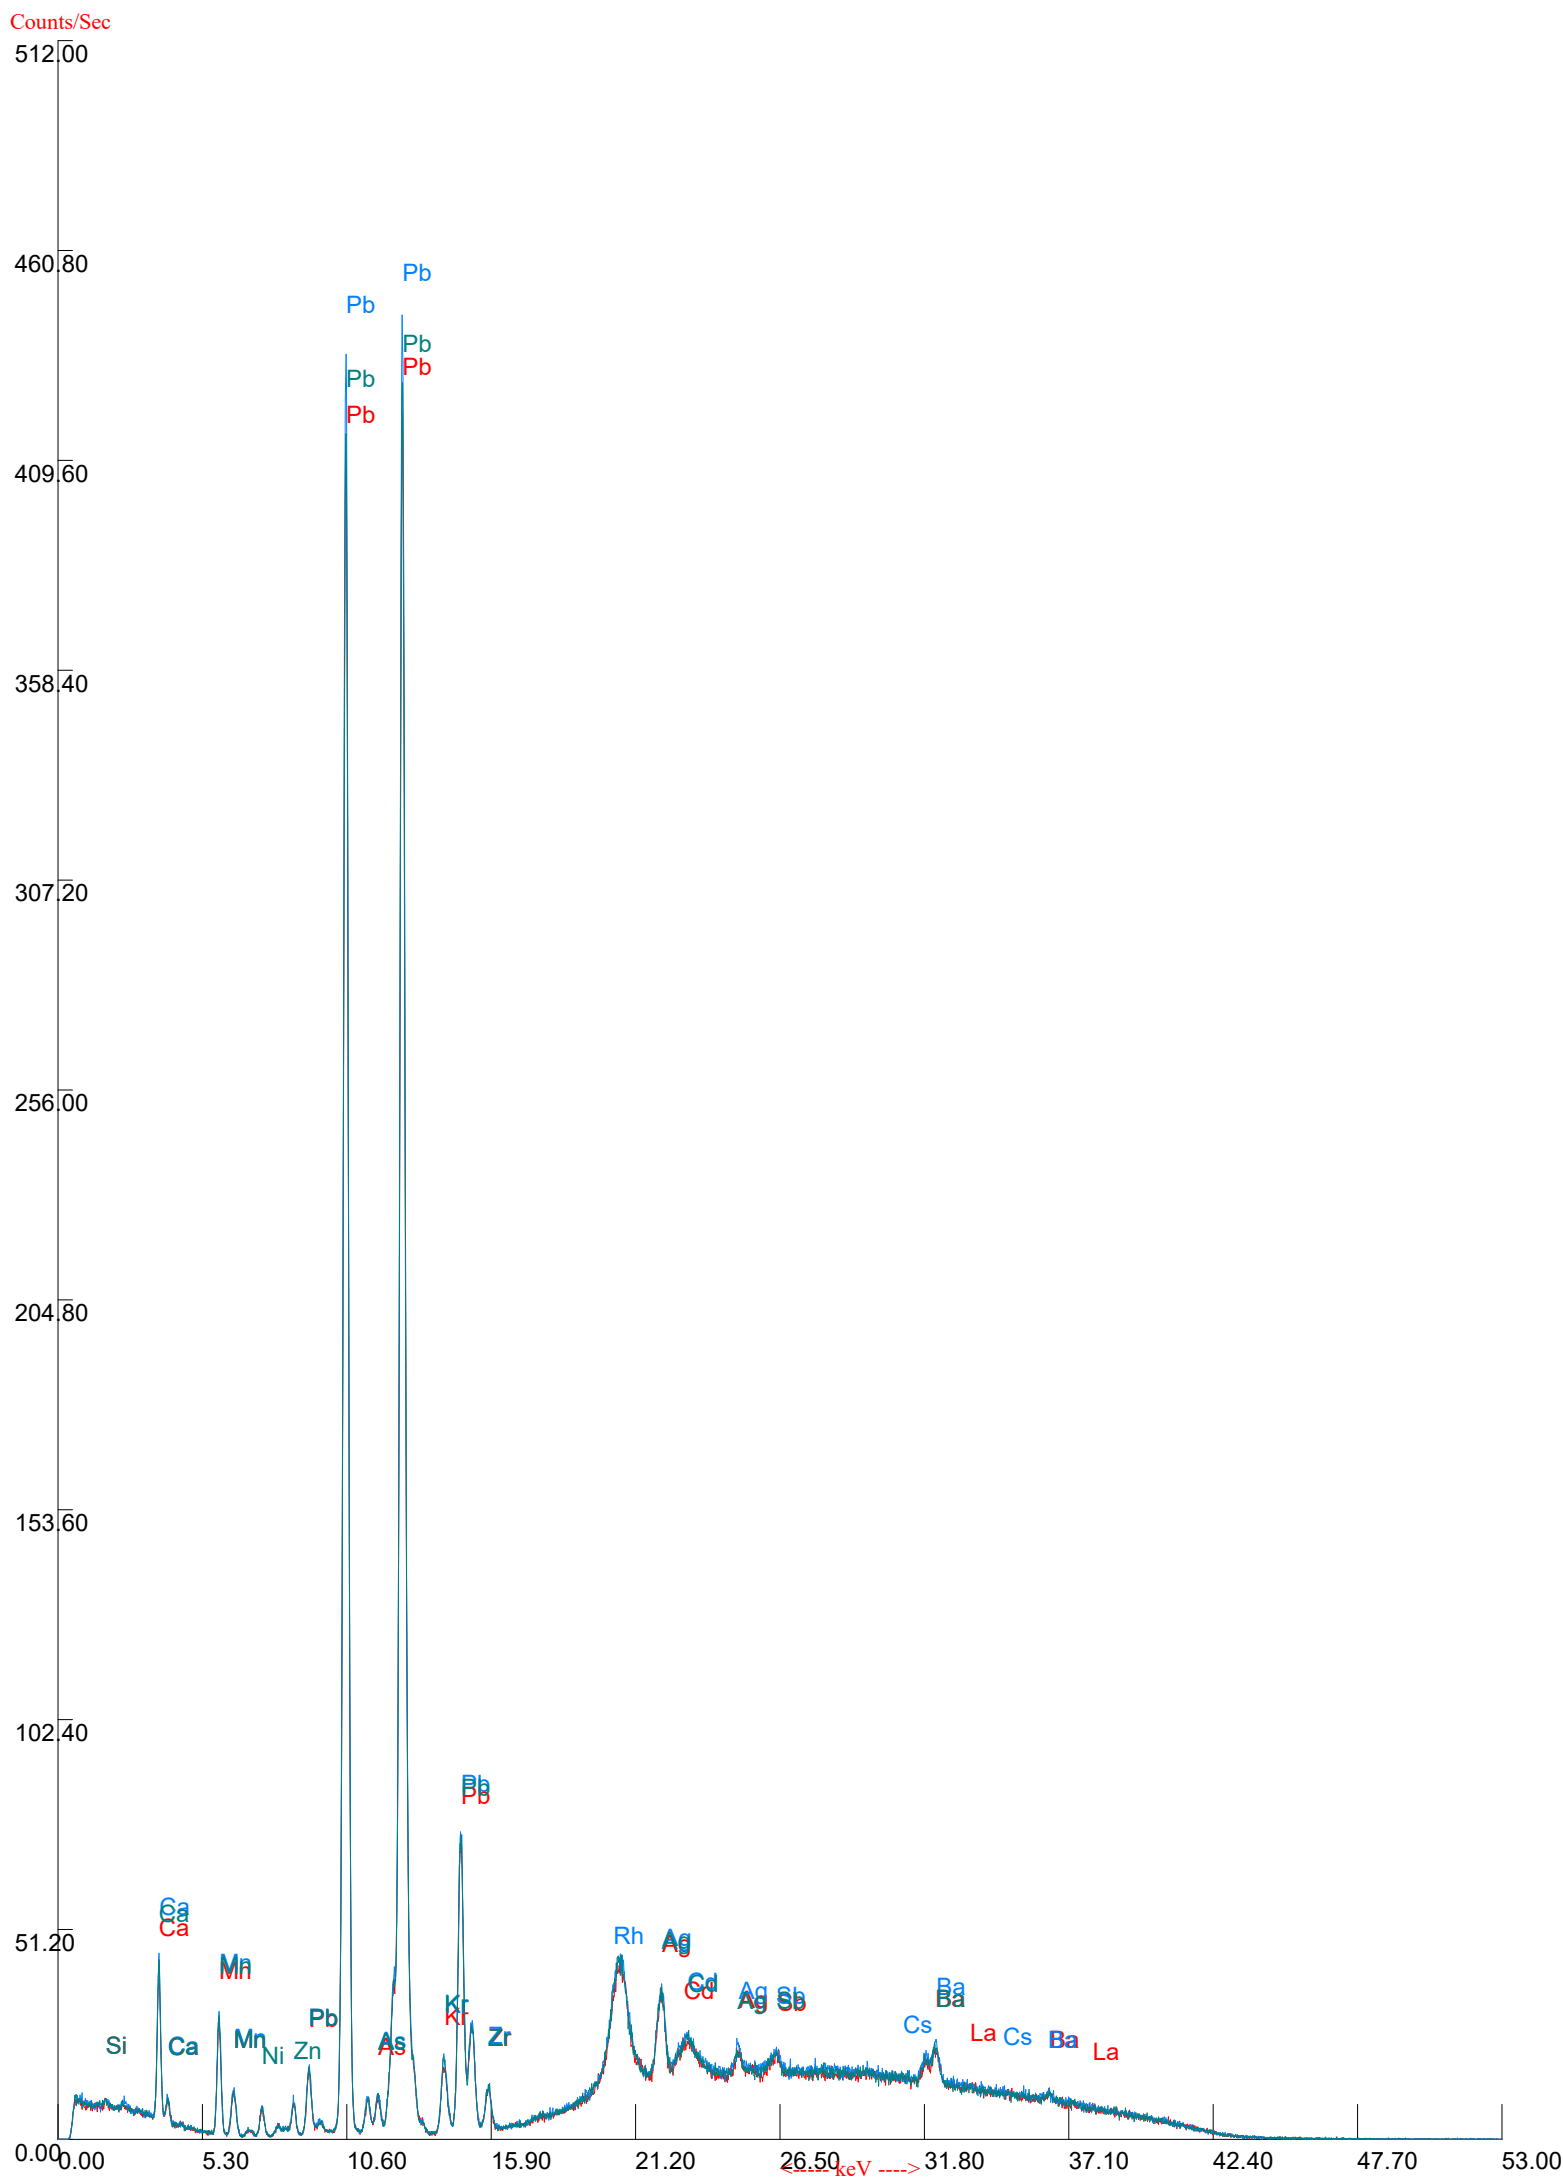

Supplement: s1 [file s1]

Counts/Sec

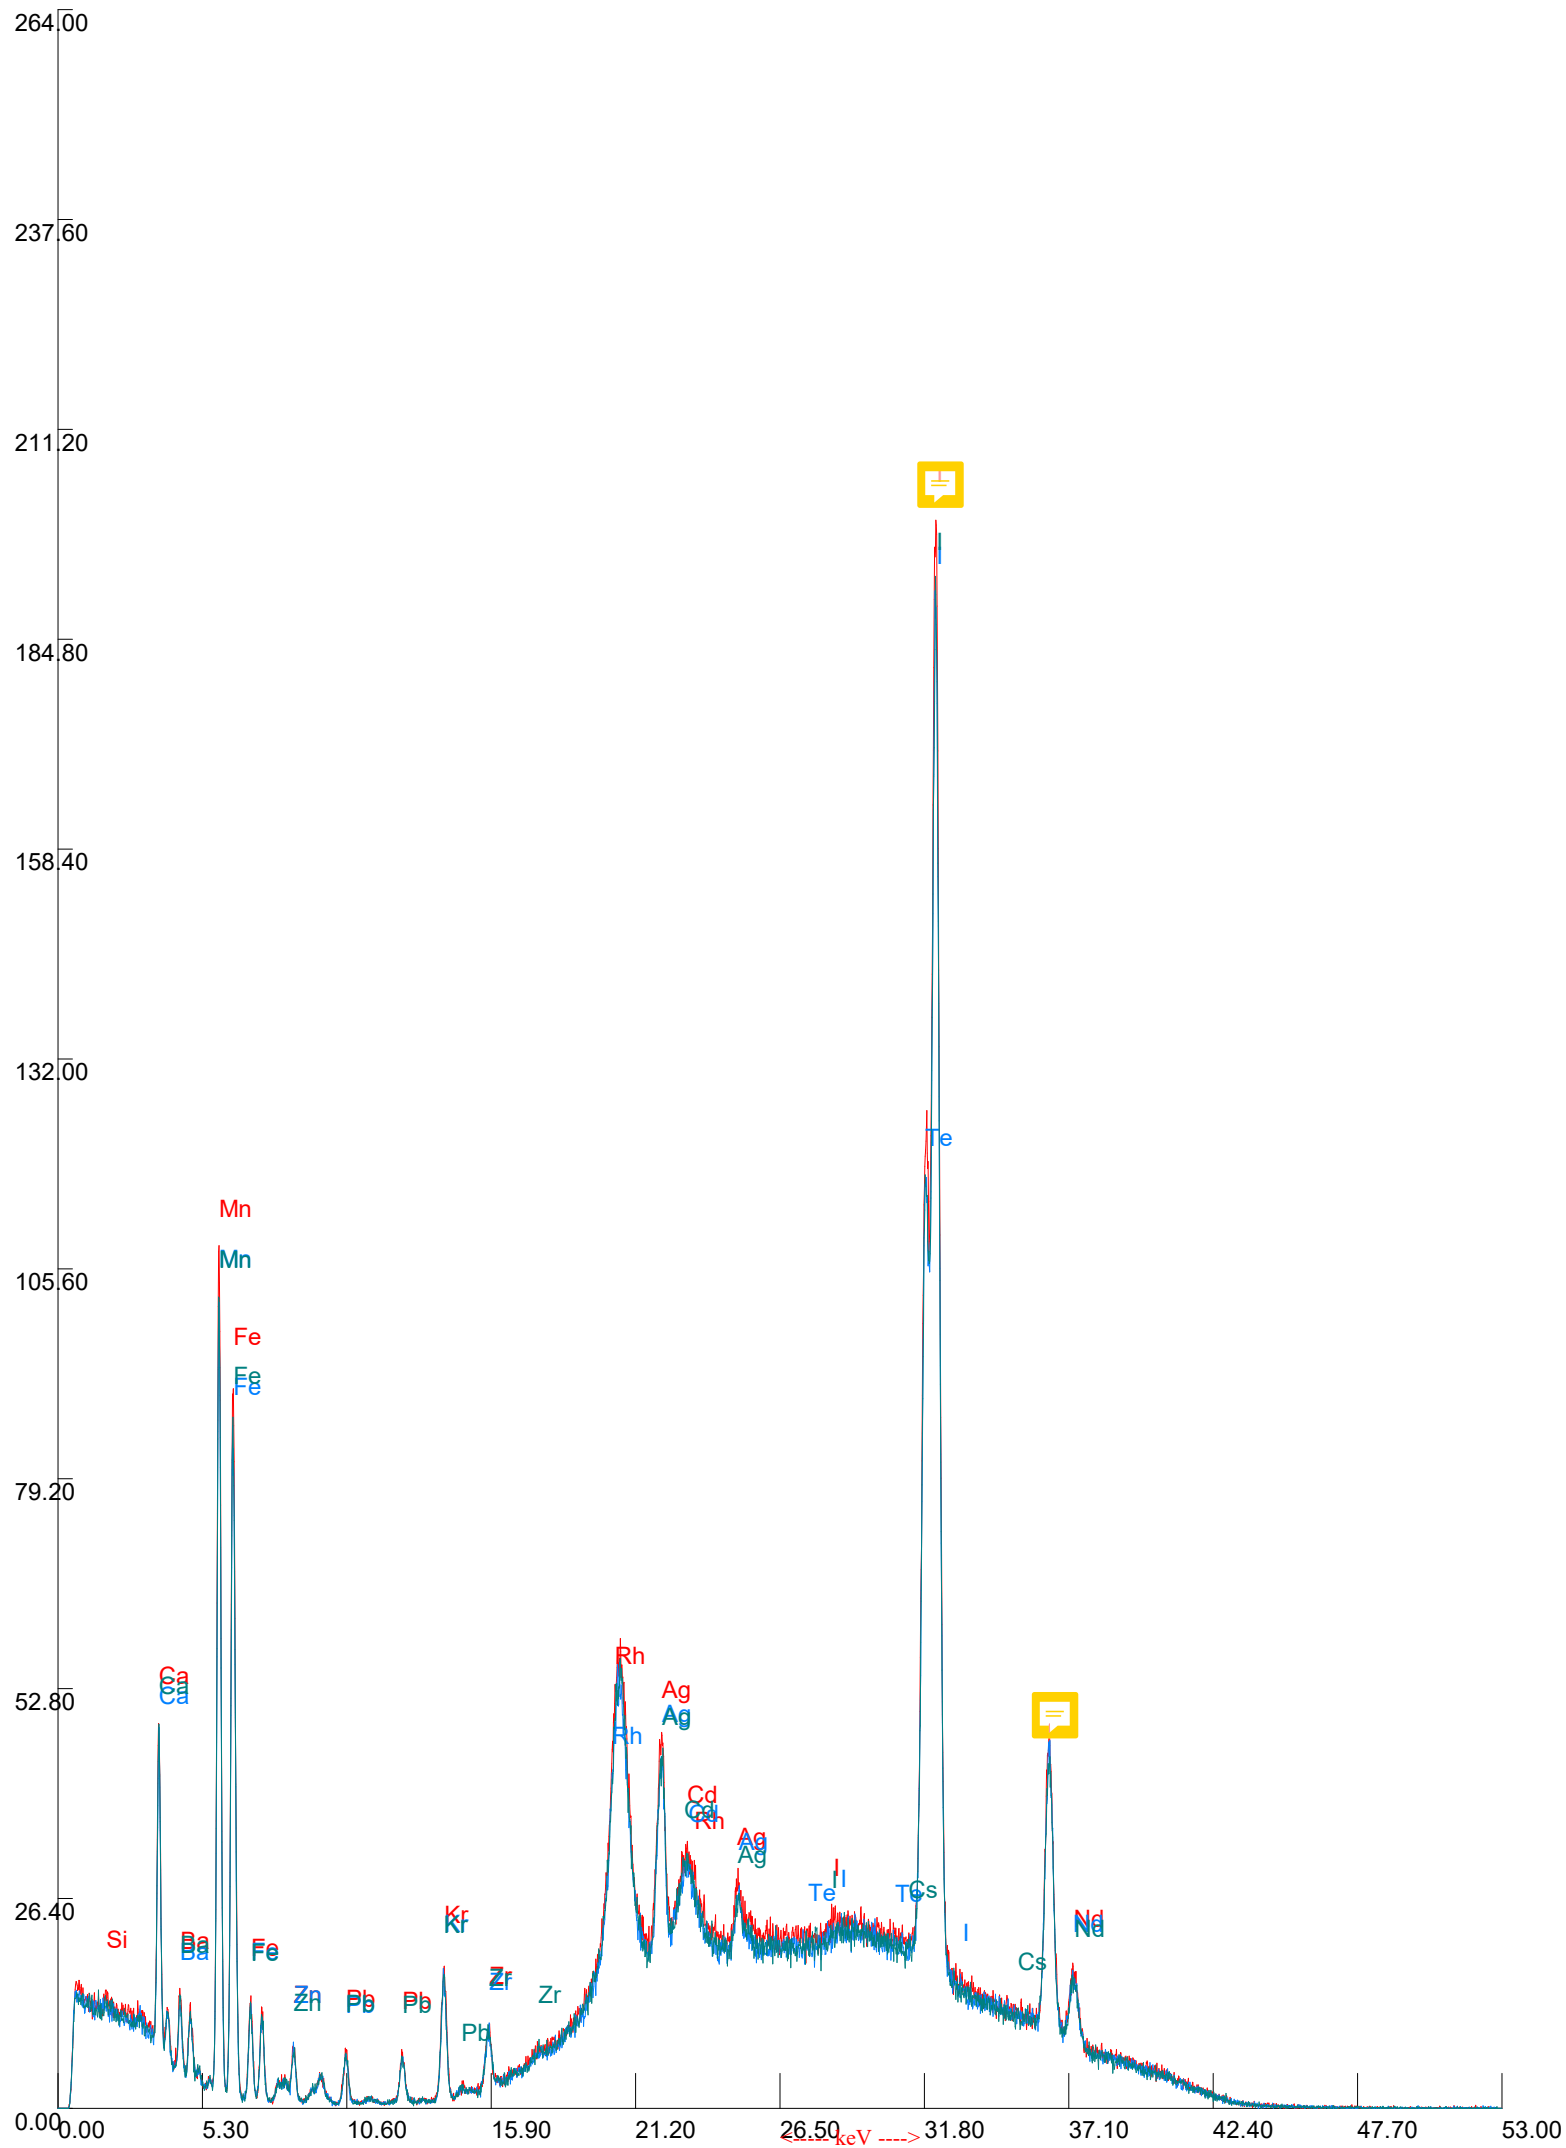

Supplement: s1 [file s1]
